1 **Title:** Natural selection constrains neutral diversity across a wide range of species

2 **Authors:** Russell B. Corbett-Detig<sup>1,2</sup>, Daniel L. Hartl<sup>1</sup>, Timothy B. Sackton<sup>1\*</sup>

3 **Affiliation:** <sup>1</sup>Department of Organismic and Evolutionary Biology, Harvard University, Cambridge

4 MA. <sup>2</sup>Department of Integrative Biology, University of California at Berkeley, Berkeley CA.

5 **\*Correspondence:** [tsackton@oeb.harvard.edu](mailto:tsackton@oeb.harvard.edu)

6 **Running Head:** Selection constrains genetic diversity across species

7

8 **Abstract:**

9 The neutral theory of molecular evolution predicts that the amount of neutral polymorphisms within a  
10 species will increase proportionally with the census population size ( $N_c$ ). However, this prediction has  
11 not been borne out in practice: while the range of  $N_c$  spans many orders of magnitude, levels of genetic  
12 diversity within species fall in a comparatively narrow range. Although theoretical arguments have  
13 invoked the increased efficacy of natural selection in larger populations to explain this discrepancy, few  
14 direct empirical tests of this hypothesis have been conducted. In this work, we provide a direct test of  
15 this hypothesis using population genomic data from a wide range of taxonomically diverse species. To  
16 do this, we relied on the fact that the impact of natural selection on linked neutral diversity depends on  
17 the local recombinational environment. In regions of relatively low recombination, selected variants  
18 affect more neutral sites through linkage, and the resulting correlation between recombination and  
19 polymorphism allows a quantitative assessment of the magnitude of the impact of selection on linked  
20 neutral diversity. By comparing whole-genome polymorphism data and genetic maps using a  
21 coalescent modeling framework, we estimate the degree to which natural selection reduces linked  
22 neutral diversity for 40 species of obligately sexual eukaryotes. We then show that the magnitude of the

1 impact of natural selection is positively correlated with  $N_c$ , based on body size and species range as  
2 proxies for census population size. These results demonstrate that natural selection removes more  
3 variation at linked neutral sites in species with large  $N_c$  than those with small  $N_c$ , and provides direct  
4 empirical evidence that natural selection constrains levels of neutral genetic diversity across many  
5 species. This implies that natural selection may provide an explanation for this longstanding paradox of  
6 population genetics.

7

## 8 **Introduction:**

9         The level of neutral genetic diversity within populations is a central parameter for  
10 understanding the demographic histories of populations [1], selective constraints [2], the molecular  
11 basis of adaptive evolution [3], genome-wide associations with disease [4], and conservation genetics  
12 [5]. Consequentially, numerous empirical surveys have sought to quantify the levels of neutral  
13 nucleotide diversity within species, and considerable theory has focused on understanding and  
14 predicting the distribution of genetic variation among species. All else being equal, under simple  
15 neutral models of evolution, levels of neutral genetic diversity within species are expected to increase  
16 proportionally with the number of breeding individuals (the census population size,  $N_c$ ). Although this  
17 prediction is firmly established, surveys of levels of genetic variation across species have revealed little  
18 or no correlation between levels of genetic diversity and population size [6-9]. This discrepancy—first  
19 pointed out by Richard Lewontin in 1974 [6]—remains among the longest standing paradoxes of  
20 population genetics.

21         One possible explanation for this disagreement is an inverse correlation between mutation rate  
22 and population size. This is expected if there is relatively weak selection against alleles that cause  
23 higher mutation rates [8,10]. Alternatively, this paradox could result from greater impact in large

1 populations of non-equilibrium demographic perturbations such as higher variance in reproductive  
2 success [11] or population-size fluctuations [12]. Indeed one recent empirical study suggests that  
3 demographic factors play an important role in shaping levels of genetic diversity within animal  
4 populations [13]. However, none of these potential explanations is sufficient to fully account for the  
5 observed patterns of neutral diversity across species [8].

6 Another potential cause of this paradox is the operation of natural selection on the genome  
7 [7,14,15]. Natural selection can impact levels of neutral diversity via the adaptive fixation of beneficial  
8 mutations (hitch-hiking) [7,15,16] and/or selection against deleterious mutations (background  
9 selection) [17,18]. Both processes purge neutral variants that are linked to selected mutations, implying  
10 that if natural selection is sufficiently common in the genome it can reduce observed levels of neutral  
11 polymorphism. Furthermore, theoretical arguments [7,14,19] suggest that, when the impact of natural  
12 selection is substantial, the dependence of neutral diversity on population size is weak or even non-  
13 existent. Although many authors have demonstrated that natural selection could, in principle, be  
14 sufficiently common to explain Lewontin's paradox [7,8,14-16,20], few direct empirical tests of this  
15 explanation exist.

16 One unique prediction of the hypothesis that natural selection is a primary contributor to  
17 disparity between  $N_c$  and levels of neutral genetic variation within species is that natural selection will  
18 play a greater role in shaping the distribution of neutral genetic variation in species with large  $N_c$ . To  
19 test this prediction, we relied on the fact that the impact of natural selection on linked neutral diversity  
20 depends on the local recombinational environment. In regions of relatively low recombination, selected  
21 variants affect more neutral sites through linkage, and vice versa in regions of relatively high  
22 recombination. The resulting correlation between recombination and polymorphism [21-26] (reviewed  
23 in depth in [27]) allows a quantitative assessment of the magnitude of the impact of selection on linked

1 neutral diversity (e.g. [22,23,26,28]). Specifically, if the effects of linked selection can explain the lack  
2 of correlation between neutral diversity and population size, we expect that species with larger  
3 population sizes will display stronger correlations between recombination and polymorphism than  
4 those with smaller population sizes, and show a concurrently larger impact of natural selection on  
5 levels of neutral diversity across the genome.

6         Although empirical studies that explore the relationship between neutral diversity and  
7 population size are relatively infrequent compared to theoretical studies on this topic, two interesting  
8 patterns that merit consideration here. First, the proportion of non-synonymous substitutions that have  
9 been driven to fixation by positive selection varies widely across taxa. In humans [29], yeast [30], and  
10 many plant species [31], estimates of this proportion are close to zero. In contrast, in *Drosophila*  
11 [32,33], mice [34], *Capsella grandiflora* [35], as well as other taxa (reviewed in [8]), a large fraction of  
12 non-synonymous substitutions are inferred to have been driven to fixation by positive selection,  
13 implying that natural selection is common in the genomes of these organisms (which generally have  
14 large  $N_c$ ). Second, the strength of the correlation between polymorphism and recombination varies  
15 widely among the limited number of taxa [8,27] which have been studied in depth. Here again,  
16 *Drosophila* [21,25,36] is among the taxa that shows the strongest correlation and thus the clearest  
17 evidence for natural selection, and the correlation in *Drosophila* is substantially larger than, for  
18 example, humans [28].

19         In a related study to the work presented here, Bazin *et al.* [37] showed that there is no  
20 correlation between nucleotide diversity in non-recombining mtDNA and nucleotide diversity in the  
21 nuclear genome. While this is consistent with some predictions of theoretical work on this subject, the  
22 mitochondrion has unusual patterns of replication and inheritance and it is therefore challenging to  
23 disentangle the processes that generate diversity from those that shape its distribution across the

1 genome. Although suggestive, the evidence accrued thus far is fragmentary, has not been analyzed in  
2 aggregate, and varies widely in quality of samples, data collection, and analyses performed [8,27]. It is  
3 therefore difficult to draw firm conclusions about the relative importance and prevalence of natural  
4 selection in shaping patterns of genetic variation in the genome based on existing studies.

5         Due to rapid advances in genome sequencing technologies, whole-genome polymorphism data  
6 are now available for a wide variety of species (*e.g.* [36,38]), and these data enable us to conduct a  
7 quantitative test of the natural selection hypothesis as an explanation for Lewontin's paradox. Towards  
8 this, we identified 40 species with sufficiently high quality reference genomes, linkage maps, and  
9 polymorphism data to enable a broad-scale, robust comparison of the relative strength of correlation  
10 between polymorphism and recombination rate within a single unified alignment, assembly, and  
11 analysis framework. Using these data, and reasonable proxies for  $N_c$ , we show that the effect of  
12 selection on linked nucleotide diversity is indeed strongly correlated population size. In other words,  
13 natural selection plays a disproportionately large role in shaping patterns of genetic variation in species  
14 with large  $N_c$ , confirming the idea that natural selection is an important contributor to Lewontin's  
15 paradox.

16

## 17 **Results:**

### 18 **Genomic Datasets and Modeling Approach**

19         We identified 40 species (15 plants, 6 insects, 2 nematodes, 3 birds, 5 fishes, and 9 mammals)  
20 for which a high quality reference genome, a high density, pedigree-based linkage map, and genome-  
21 wide resequencing data from at least two unrelated chromosomes within a population were available  
22 (Table 1 and Supplemental Tables S1 and S2). Because our model (below) requires that recombination

1 has been sufficiently frequent to uncouple genealogies across large tracts of DNA on chromosomes, we  
2 required that each species have an obligatory sexual portion of its life cycle. This requirement  
3 necessarily excludes clades such as bacteria, which are predominantly clonally propagated.  
4 Nonetheless, extending this framework to bacterial taxa will be an important step towards  
5 understanding the mechanisms by which natural selection shapes patterns of variation across the tree of  
6 life. Additionally, our sampling is biased towards more commonly studied clades (e.g., mammals), but  
7 this is unavoidable in this type of analysis, and there is no reason in principle why this taxonomic bias  
8 would affect the basic conclusions we describe here, as the sampled taxa likely span a large range of  
9 census population sizes.

10         After acquiring sequence data, we developed and implemented a bioinformatic pipeline to  
11 align, curate, and call genotype data for each species (see Figure S1 and methods for a full description  
12 of the bioinformatics pipeline). We further used the available genetic maps to estimate recombination  
13 rates across the genomes. Across all species, we analyzed recombination across nearly 385,000 markers  
14 and aligned more than 63 billion short reads. This is therefore the largest comparative population  
15 genomics dataset that has been assembled to date.

16         We used both simple nonparametric correlations, and explicit coalescent models, to test for a  
17 relationship between the impact of selection on linked neutral diversity and census size. Although  
18 correlations between recombination rate and neutral diversity are informative, the extensive literature  
19 in theoretical population genetics provides an opportunity to develop a robust modeling approach. Two  
20 primary types of selection can introduce a correlation between recombination rate and levels of  
21 nucleotide diversity: background selection (BGS) and hitchhiking (HH). Here, we are not primarily  
22 largely concerned with distinguishing between the two models, and so focus on their joint effects. In  
23 addition to combining background selection and hitchhiking, we would also like to relax the

1 assumption that these processes act uniformly across the genome. All else being equal, regions of the  
2 genome with a higher density of potential targets of selection should experience a greater reduction in  
3 neutral diversity.

4 Starting from considerable prior theoretical work [14,17,18,32,39-41], we develop an explicit  
5 model relating polymorphism, recombination rate, and density of functional elements in the genome.  
6 We fit both a joint model that allows for both HH and BGS, as well as models of BGS only, HH only,  
7 and a purely neutral model (in which there is no predicted correlation between recombination or  
8 functional density and neutral diversity). Using these models, we estimate the fraction of neutral  
9 diversity removed by linked selection for beneficial alleles and/or against deleterious alleles (Figure 1)  
10 for each species, as well as the relative likelihood of each model.

11 In practice it is not feasible to determine  $N_c$  for the majority of species we studied. Instead, we  
12 used the species' geographic range and individual body size as proxies for  $N_c$ . Size has been previously  
13 validated as a proxy for individual density in a wide variety of taxa and ecosystems (e.g. [42-44]).  
14 Under some simplifying assumptions, the product of geographic range and local density should be  
15 sufficient to roughly estimate a species census population size, and each factor is expected to  
16 independently capture some information related to species'  $N_c$ . Specifically, we expect that range will  
17 be positively correlated with  $N_c$ , size will be negatively correlated with  $N_c$ , and  $N_c$  will be positively  
18 correlated with the impact of selection.

19

## 20 **Natural Selection Removes More Linked Neutral Variation in Species with Large Census Sizes**

21 For many of the species that we studied, it is clear that selection plays a central, even dominant,  
22 role in shaping patterns of neutral genetic diversity. Specifically, both our correlation analysis and our

1 explicit modeling support the hypothesis that natural selection on linked sites eliminates  
2 disproportionately more neutral polymorphism in species with large  $N_c$ , and in this way natural  
3 selection truncates the distribution of neutral genetic diversity.

4         At a coarse scale, there is a stronger correlation between polymorphism and recombination in  
5 invertebrates (mean partial  $\tau$  after correcting for gene density = 0.247), which likely have a large  $N_c$  on  
6 average, than in vertebrates (median partial  $\tau$  = 0.118), which likely have smaller  $N_c$  on average (two-  
7 tailed permutation  $P$  = 0.021). We observe similar patterns for herbaceous plants (mean partial  $\tau$  =  
8 0.106) versus woody plants (mean partial  $\tau$  = -0.020; two-tailed permutation  $P$  = 0.058) and for  
9 medians as opposed to means (Figure 2). When we repeat the analysis with alternate window sizes, we  
10 observe consistent effect sizes, albeit occasionally with reduced statistical support (Supplemental Table  
11 S3).

12         More generally, we tested the hypothesis that  $N_c$  is positively correlated with the impact of  
13 selection by fitting a linear model that includes body size, geographic range, kingdom and the  
14 significant interactions among them as predictors, and uses the impact of selection estimated from our  
15 coalescent model as the response variable (Table 2; Figure 3). Both size and range are significant  
16 predictors of the impact of selection in the expected directions (Table 2;  $\log_{10}(\text{size})$ : coefficient =  
17 -0.092,  $P$  = 0.0005;  $\log_{10}(\text{range})$ : coefficient = 0.112,  $P$  = 0.0002), and model as a whole explains  
18 63.88% of the variation in impact of selection across species (Table 2; overall  $P$  =  $3.518 \times 10^{-8}$ ). This is  
19 clear evidence that more variation is removed from the genomes of species with smaller body size and  
20 larger ranges than from the genomes of species with larger body size and smaller ranges.

21         A number of confounding factors could potentially influence our conclusions, including  
22 variation in map or assembly quality across species, differences in overall recombination rate, and  
23 differences in genome size. To test whether these factors can explain our results, we fit a confounder-



1 only model including two measures of genetic map quality (density of useable markers and proportion  
2 of total markers scored as useable); two measures of assembly quality (proportion of assembly that is  
3 not gaps and proportion of total assembly assembled into chromosomes); overall recombination rate;  
4 and genome size. We then compare this confounder-only model to a model that includes all  
5 confounding parameters, and in addition includes our population size proxies (kingdom, size, range).  
6 The model with proxies for  $N_c$  both explains substantially more total variation in impact of selection  
7 (adjusted  $R^2$  0.6359 compared to 0.3388 for the confounder-only model) and is a significantly better fit  
8 to the data ( $F=7.7322$ ,  $df=4$ ,  $P=0.0002$ ).

9 To get a lower bound on the proportion of variation in impact of selection explained by our  
10 parameters of interest (range, size, kingdom, and the kingdom\*size interaction), we fit a linear model  
11 with these parameters as predictors and the residuals of the confounder-only model as the response  
12 variable (Supplemental Tables S4, S5). This is a conservative test, as genome size is strongly correlated  
13 with body size (Kendall's  $\tau = 0.296$ ,  $P=0.007$  in our dataset). Nonetheless, our proxies for  $N_c$  explain  
14 34.05% of the remaining variation in impact of selection after accounting for all confounding  
15 parameters (overall model  $P = 0.0008$ , Table S4), and 47.36% of the variation after accounting for all  
16 confounding parameters except genome size (overall model  $P = 2.042 \times 10^{-5}$ , Table S5).

17 For five species, our polymorphism data included individuals from domesticated populations,  
18 which could potentially affect our conclusions if selection has a different signature during  
19 domestication events than it leaves in natural populations. However, removing these five species has  
20 virtually no impact on our model fit (overall adjusted  $R^2 = 0.6281$ , overall  $P = 6.094 \times 10^{-7}$ ,  
21 Supplemental Table S6), suggesting that their inclusion has not biased our results. Additionally, we  
22 obtain similar results if we fit our model (excluding the kingdom term) to animals and plants  
23 independently (Supplemental Table S7 and S8). Finally, varying the SNP filtering criteria, window size,

1 assumed deleterious mutation rate ( $U$ ), or population genetic modeling approach produces nearly  
2 identical results (Figure 3C), implying our primary conclusion is robust to a wide range of analysis  
3 choices. Taken together, our analysis demonstrates that the central pattern – natural selection reduces  
4 neutral diversity more strongly in species with large  $N_c$  than in species with small  $N_c$  – is consistently  
5 observed with both nonparametric model free approaches (Figure 2; Supplemental Table S3) and with  
6 explicit population genetic models (Figure 3A,B, Table 2) across a wide range of possible analysis and  
7 filtering choices (Figure 3B, Supplemental Tables S4-S8).

8         If the process of recombination is itself mutagenic, neutral processes could produce a  
9 correlation between recombination and polymorphism [21,25,27]. However, no or very weak  
10 correlations between divergence and recombination has been found in most species that have been  
11 closely studied [21,25] (reviewed in [27]). Moreover, for those species in which a positive correlation  
12 between divergence and polymorphism has been found (*e.g.* [45,46]), it is likely at least partially the  
13 result of linked selection acting on polymorphisms present in the ancestral population [27,32].  
14 Furthermore, the two species that showed the strongest correlation between polymorphism and  
15 recombination (partial  $\tau = 0.5196$  for *D. melanogaster*, partial  $\tau = 0.4637$  for *D. pseudoobscura*) have  
16 no such correlation between recombination rate and divergence either on broad scales [21] or fine  
17 scales [25]. Moreover, many authors have found strong evidence that recombination is not mutagenic  
18 in a number of other animal species (*e.g.* [28,47,48]), and it therefore appears a general consensus has  
19 emerged that recombination-associated mutagenesis is unlikely to influence the overall patterns we  
20 report in this work [27].

21

## 22 **Species with Small Census Sizes Show Stronger Evidence for Neutrality**

23         As an alternative approach to estimating the impact of natural selection on linked neutral

1 diversity, we considered whether our proxies for  $N_c$  correlates with the strength of evidence that  
2 selection shapes patterns of neutral diversity, derived from our population genetic modeling approach.  
3 To do this, we focus on the relative likelihoods (Akaike weights) of four models: the BGS+HH model,  
4 the BGS-only model, the HH-only model, and the neutral model. These relative likelihoods can be  
5 interpreted as the probability that a particular model is the best model according to AIC, given the set  
6 of models tested and the underlying data.

7 We initially focus on the relative likelihood of the support for a purely neutral model. Species  
8 with weak or no support for neutrality (relative likelihood of the neutral model  $< 0.05$ ) have  
9 significantly larger ranges ( $P=0.006$ , Wilcoxon Rank Sum Test, Figure 4A) and significantly smaller  
10 sizes ( $P=0.0001$ , Wilcoxon Rank Sum Test, Figure 4B) than species with moderate (relative likelihood  
11 of neutral model  $\geq 0.05$  and  $< 0.90$ ) or strong (relative likelihood of neutral model  $\geq 0.90$ ) support.  
12 This pattern also holds if we compare the species with strong support for neutrality or species with  
13 moderate support for neutrality individually to species with weak or no support (moderate vs weak:  $P=$   
14  $0.0005$  for size and  $0.02$  for range; strong vs weak:  $P=0.02$  for size and  $0.02$  for range, all  $P$ -values  
15 from Wilcoxon Rank Sum Tests). This suggests that the evidence for non-neutral processes  
16 (background selection and/or hitchhiking) is significantly stronger in species with larger ranges and/or  
17 smaller sizes, consistent with our results above and with the hypothesis that natural selection explains  
18 Lewontin's paradox.

19

## 20 **Hitch-hiking Appears More Prevalent in Large $N_c$ Species**

21 Given the extensive debate on the relative importance of hitch-hiking versus background  
22 selection in shaping patterns of diversity across the genome [17,21], we also attempt to disentangle the  
23 relative roles of these two processes in reducing neutral diversity. This is potentially relevant to the

1 resolution of Lewontin's paradox, as models of frequent, recurring hitch-hiking (i.e., genetic draft [7])  
2 demonstrate that recurrent hitch-hiking can remove the dependence of neutral diversity on population  
3 size entirely. Thus, evidence that hitch-hiking specifically is more likely to occur in species with large  
4 census sizes would be compelling evidence for a role of selection in resolving the discrepancy between  
5 population sizes and neutral diversity. However, it is crucial to note that our test does not take into  
6 account features, such as patterns of polymorphism around amino acid fixations [23,49], that are  
7 particularly powerful for distinguishing hitch-hiking and background selection, and thus suffers from  
8 many of the limitations of previous work relying purely on patterns of neutral diversity across the  
9 genome (*e.g.* [26,28,40,41]).

10         With that caveat, we begin by noting that, consistent with recent work in *Drosophila* [49,50]  
11 and other organisms [26,28,48], background selection is ubiquitous. Either the BGS-only model or the  
12 BGS+HH model has at least some support (relative likelihood  $> 0.05$ ) for 95% (38 of 40) of the species  
13 we analyzed, and for 90% (36 of 40) of species one of the BGS-containing models was the best fit, as  
14 measured by AIC. Thus, it seems clear that, in most cases, background selection is a more appropriate  
15 null model for tests of natural selection than strict neutrality.

16         To test whether species with moderate (relative likelihood of HH or BGS+HH  $> 0.05$  and  $< 0.5$ )  
17 or strong (relative likelihood of HH or BGS+HH  $> 0.5$ ) evidence for hitch-hiking differ from species  
18 with little or no evidence for hitch-hiking (relative likelihood of HH or BGS+HH  $< 0.05$ ), we examined  
19 our proxies for  $N_c$  among these evidence classes. Species with moderate or strong evidence for hitch-  
20 hiking have significantly larger ranges than species with weak/no evidence for hitch-hiking ( $P=0.03$ ,  
21 Wilcoxon Rank Sum Test, median range (low) = 2681693 sq km, median range (med/high) = 5592037  
22 sq km), and these species tend to have smaller sizes as well ( $P=0.15$ , Wilcoxon Rank Sum Test, median  
23 size (low) = 0.91 m, median size (med/high) = 0.54 m).

1           As a secondary test of this pattern, we compared whether the relative likelihood of hitch-hiking  
2 was greater for species estimated to have particularly high  $N_c$  compared to species estimated to have  
3 particularly low  $N_c$ . We define the high- $N_c$  class as those species with ranges greater than the median  
4 range, and sizes below the median size, and we define the low- $N_c$  class as those species with ranges  
5 below the median range and sizes above the median size. The relative likelihood of hitch-hiking  
6 models is greater for species in the high- $N_c$  class ( $P=0.023$ , Wilcoxon Rank Sum Test), and the  
7 proportion of species with moderate or strong evidence for hitch-hiking (either alone or in combination  
8 with BGS) is higher in the high- $N_c$  class than the low- $N_c$  class (4/10 in high- $N_c$  class, 0/10 in low- $N_c$   
9 class,  $P=0.086$ , Fisher's Exact Test).

10           Despite the fact that our test is unlikely to have substantial power to distinguish background  
11 selection and hitch-hiking models, we suggest that these results imply that hitch-hiking in particular is  
12 a stronger force shaping genomic diversity in species with large  $N_c$ , while background selection  
13 appears to be much more pervasive. The observation that pervasive hitch-hiking may predominantly  
14 occur in species with large  $N_c$  suggests that genetic draft may play a substantial role in limiting neutral  
15 diversity among the species with the largest population sizes. More data on species with very large  $N_c$ ,  
16 and the application of tests specifically designed to detect hitch-hiking to a wider taxonomic range, will  
17 be necessary to fully disentangle the relative roles of hitch-hiking and background selection in shaping  
18 levels of neutral diversity.

19

## 20 **Discussion**

21           On the strength of early allozyme polymorphism data, Lewontin [6] observed that in contrast  
22 with theoretical predictions of the neutral theory [51-53], the range of neutral genetic variation among  
23 species is substantially smaller than the range of  $N_c$  among species. Because both positive selection via

1 hitch-hiking and negative selection via background selection purge linked neutral mutations, the  
2 operation of natural selection affects patterns of neutral genetic variation at linked sites across the  
3 genome. Although many authors have suggested that natural selection may play a role in truncating the  
4 distribution of genetic variation and may play a greater role than neutral genetic drift in shaping  
5 patterns of neutral nucleotide polymorphism [7,8,14,15], few empirical tests of this hypothesis has  
6 been proposed or conducted. Here, we showed that species with larger  $N_c$  display a stronger correlation  
7 between neutral polymorphism and recombination rate, and that natural selection removes  
8 disproportionately more linked neutral variation from species with larger populations. This indicates  
9 that natural selection plays a disproportionately large role in shaping patterns of polymorphism in the  
10 genome of species with large  $N_c$ .

11         One important consideration when interpreting our results is that cryptic population structure  
12 can influence patterns of variation across the genome in a way that obscures the effects of selection. In  
13 the extreme case, where populations do not exchange any migrants for an extended period of time,  
14 genetic divergence is expected to accumulate at equivalent rates across the genome and would obscure  
15 the effects of linked selection. Elucidating the complex relationship between population structure and  
16 patterns of natural selection is an important and longstanding question in population genetics (for  
17 recent work see *e.g.* [54,55]). Nonetheless, especially given the scope of our analysis, it is not feasible  
18 to simultaneously estimate the effects of linked selection and population structure, and there are many  
19 reasons to believe that the results presented here will be robust to potential cryptic population structure.

20         So long as the population subdivision is not especially ancient (in the timescale of coalescence,  
21 on the order of  $N_e$  generations), a correlation between recombination and polymorphism is expected to  
22 remain due to the effects of selection on linked sites in the ancestral population [27,32]. Additionally, if  
23 migration is sufficiently common, it is reasonable to treat data derived from samples from separate

1 localities as a single population [56]. One straightforward assumption is that species with larger  
2 geographic ranges will have greater opportunity on average to accumulate cryptic population structure  
3 than species with small ranges, which would imply we should preferentially underestimate the effects  
4 of linked selection in species with larger ranges. If population structure is a primary determinant of  
5 patterns of nucleotide diversity in taxa that we studied, we could reasonably expect a negative  
6 correlation between species range and the effects of selection on linked sites. Given that we instead  
7 obtain the opposite effect—one consistent with the effect of selection on linked neutral sites—it is  
8 reasonable to conclude that cryptic population structure has not drastically influenced the basic results  
9 presented herein.

10         Understanding the proximate and ultimate factors that affect the distribution of genetic variation  
11 in the genome is a central and enduring goal of population genetics and it carries important  
12 implications for a number of evolutionary processes. One implication of this work is that in species  
13 with large  $N_c$ , such as *D. melanogaster*, selection plays a dominant role in shaping the distribution of  
14 molecular variation in the genome. Among other things, this can affect the interpretation of  
15 demographic inferences because it indicates that even putatively neutral variants are affected by natural  
16 selection at linked sites. Furthermore, to whatever degree standing functional variation is also affected  
17 by selection on linked sites (*e.g.* [40]), local recombination rate in organisms with large  $N_c$  may also  
18 predict what regions of the genome will contribute the greatest adaptive responses when a population is  
19 subjected to novel selective pressures.

20         More broadly, this work provides some of the first direct empirical evidence that the standard  
21 neutral theory may be violated across a wide range of species. Indeed, it is clear from this work that in  
22 many taxa, natural selection plays a dominant role in shaping patterns of neutral molecular variation in  
23 the genome. It is therefore essential that we consider selective processes when we study the distribution

1 of genetic diversity within and between species. Incorporating selection into standard neutral models of  
2 evolution will be a central and important challenge for evolutionary geneticists going forward.

3

## 4 **Materials and Methods:**

### 5 **1. Data sources and curation**

6 Reference genome versions, annotation versions, map references, and other basic information  
7 about the genetic and genomic data for species we included in our analysis is summarized in  
8 Supplemental Table S1 and S2, and described in more detail below.

#### 9 *Reference genomes*

10 To identify suitable species for our analysis, we started from the list of genome projects  
11 available at GOLD (<http://www.genomesonline.org/documents/Export/gold.xls>) and NCBI  
12 ([ftp://ftp.ncbi.nlm.nih.gov/genomes/GENOME\\_REPORTS/](ftp://ftp.ncbi.nlm.nih.gov/genomes/GENOME_REPORTS/)), both accessed 6 October 2013. We  
13 removed all non-eukaryotes from both sets. We then further filtered the GOLD set to remove all  
14 projects where status was not either “draft” or “complete”, and where project type was not “Whole  
15 Genome Sequencing”, and the NCBI set to keep only all projects with MB > 0 and status equal to  
16 “scaffold,” “contigs,” or “chromosomes.” Finally, we merged both lists, removed duplicate species, and  
17 removed all species without an obligate sexual lifestyle. We required species have an obligatory sexual  
18 portion of their lifecycle to ensure that some amount of recombination can be expected in natural  
19 populations.

20 Next, we manually checked the quality of the genome assembly of each species remaining on  
21 our list by inspection of assembly reports available from NCBI, Ensembl, Phytozome, or species-  
22 specific databases. Any species without chromosome-scale assemblies was removed, as was any



1 species without an available annotation of coding sequence. In two cases (*Heliconius melpomene* and  
2 *Gasterosteus aculeatus*), chromosome scale assemblies are available but annotations were only  
3 available for the scaffold-level (or a previous, lower quality chromosome-level) assembly. In these  
4 cases, we updated the coordinates of the coding sequence annotations using custom Perl scripts  
5 (available from the GitHub page associated with this manuscript: see the data accessibility section for  
6 details on how to obtain source code and data).

### 7 *Polymorphism*

8 We required that each species be represented by random-shearing Illumina short-read sequence  
9 data for at least two chromosomes derived from unrelated individuals within the same population. For  
10 4 species (*Bos taurus*, *Lepisosteus oculatus*, *Prunus persica*, *Papio anubis*) we used a single outbred  
11 diploid individual. If samples were intentionally inbred or if the species is known to engage in frequent  
12 self-fertilization in natural populations, we required data from at least two separate individuals. The  
13 number of individuals included and the ploidy of the sequenced individuals are reported in Table S1.  
14 For six species, we used polymorphism data from a very closely related taxon to the species that was  
15 sequenced to produce the reference genome (Table S1). In particular, we attempted to avoid using  
16 polymorphism data from domesticated species where possible; in many cases we were able to use  
17 polymorphism data from wild ancestors or close relatives of domesticated plants and animals.  
18 Nonetheless, for five species (*Gallus gallus*, *Bos taurus*, *Melagris gallopavo*, *Setaria italica*, and  
19 *Citrus reticulata*), we could not identify suitable data from wild populations, and we instead elected to  
20 use polymorphism data from heritage breeds and strains (Table S1).

### 21 *Genetic maps*

22 We required that each species have available a pedigree-based genetic map, generated from  
23 markers that could be mapped to the reference genome by either ePCR or BLAST, and with an average

1 inter-marker spacing (after filtering unmapped and mis-mapped markers; see below) of no more than  
2 10 cM. For species with recombination in both sexes, we used sex-averaged genetic distances where  
3 possible, although in two cases (*Anopheles gambiae* and *Bos taurus*) maps were only available for a  
4 single sex and so for those species we use a single-sex map by necessity. For species with  
5 recombination in only one sex (e.g. *Drosophila*), we corrected genetic distances to represent a sex-  
6 averaged value by dividing by dividing estimated recombination rates in the sex with recombination by  
7 2. In 9 cases where genetic maps from the same species as the polymorphism data were unavailable or  
8 of insufficient quality (*Zea mays*, *Prunus persica*, *Papio anubis*, *Oryza sativa*, *Ovis aries*, *Mus*  
9 *musculus*, *Equus caballus*, *Canis lupus familiaris*, *Citrus clementina*) we used genetic maps from a  
10 closely related taxon, typically the genome species (see Table S1 for full details).

#### 11 *Range and size information*

12 While ideally we would obtain estimates of actual census population sizes, even moderately  
13 accurate estimates are rarely available. As an alternative, we used species range and individual size as  
14 proxies for census population size. To determine range, we used occurrence data available from GBIF  
15 (<http://www.gbif.org/>) or published literature (when no occurrence data was available in GBIF) to  
16 estimate species distributions as follows. First, for each species, we obtain and then filter all occurrence  
17 data stored at GBIF. In general, we filter to require a known source (basis of observation) and exclude  
18 fossil records; we also filter to remove clearly erroneous points, such as those well outside the known  
19 species range (often arising, e.g., from transposition of longitude and latitude during data entry in  
20 museum records) or those falling in oceans for terrestrial organisms and vice versa. Specific filtering  
21 steps for each species are documented in the associated R code (available at GitHub). After filtering,  
22 we fit an alpha-hull [57] to estimate the species range, which we then filter to remove area overlapping  
23 ocean for terrestrial species and overlapping land from oceanic species, and then convert to area by

1 projecting from GPS (WGS84) coordinates to a cylindrical equal area projection using the `spTransform`  
2 function in the R package `rgdal` (<http://cran.r-project.org/web/packages/rgdal/>). R scripts to replicate  
3 our analysis are provided at the GitHub page associated with this manuscript.

4 We recognize that GBIF occurrence data reflects current range, and does not account for  
5 historical range; however, as accurate long-term historical ranges are not known for most species we  
6 are limited to using the data that is available. We also note that for the five domesticated species, plus  
7 humans, occurrence data is not of much use for estimating range; in these cases we have attempted to  
8 approximate either the historical range of the species (humans, turkey, clementine) or the current range  
9 of the heritage breeds the polymorphism sample is obtained from (chicken, cow, millet).

10 In order to account for variation in population density across species, we also use individual  
11 size as a second proxy for  $N_c$ . Body size has been validated as a proxy for local population density  
12 across a wide variety of systems and taxa (*e.g.* [42-44]), and is readily available from common  
13 databases such as Encyclopedia of Life and Animal Diversity Web (Supplemental Table S9). While it  
14 would be ideal to obtain quantitative estimates of population densities (*e.g.* by using extensive mark-  
15 recapture methods [58]), for the majority of species we studied reliable direct estimates of population-  
16 densities are not available.

## 17 **2. Polymorphism pipeline**

### 18 *Alignment and genotyping pipeline*

19 We acquired short read data from the NCBI short read trace archive. All accession numbers for  
20 short read data used in this analysis are listed in Supplemental Table S10. We aligned these data to their  
21 respective reference genomes (reference genome versions and relevant citations are listed in  
22 Supplemental Table S1). For libraries prepared from genomic DNA we used `bwa v0.7.4` [59] with

1 default options. For libraries prepared from RNA, we aligned reads initially using tophat2 v2.0.7 [60]  
2 with default options, except we specified '-no-novel-juncs' and '--no-coverage-search' and gave tophat2  
3 a GFF file (version indicated in Table S1) to speed up alignment. For both DNA and RNA we then  
4 realigned reads that failed to align confidently using Stampy v1.0.21 [61], with default options. After  
5 this, putative PCR duplicates were removed from both RNA and DNA based libraries using the  
6 'MarkDuplicates' function in Picard v1.98 (<http://picard.sourceforge.net>). For DNA libraries, we next  
7 use the 'IndelRealigner' tool in the GATK v2.4-3 [62] to realign reads surrounding likely indel  
8 polymorphisms. These GATK and Picard functions were run using default command line options.

9         We genotyped all samples using the GATK v2.4-3 [62]. If samples were intentionally inbred, or  
10 if the species is known to primarily reproduce through self-fertilization in natural populations we used  
11 the '-ploidy' option to set the expected number of chromosomes to 1 (see Supplemental Table S1 for  
12 ploidy settings used for each species). We then extracted polymorphism data from four-fold degenerate  
13 synonymous sites. While there is mounting evidence that these sites are not evolving under strictly  
14 neutral processes (*e.g.* [63,64]), four-fold degenerate sites are a widely accepted approximation for  
15 neutral markers in the genome, and importantly these sites are available in both RNA and DNA  
16 sequencing efforts.

17         We sought to exclude low confidence sites by filtering our genotype data through several basic  
18 criteria. First, we required that every fourfold degenerate site have a minimum phred-scaled probability  
19 of 20 that there is a segregating site within the sample. To ensure robustness of our results, we also  
20 applied a more stringent Q30 genotype quality filter and performed otherwise identical analyses using  
21 these data. Second, for every fourfold degenerate site, we computed the mean depth for each sample.  
22 We then required each sample have at least half as many reads as the mean depth at a site for that  
23 position to be included in the analysis. For variable sites, we further required that phred-scaled strand

1 bias be below 40. This quantity is based on an exact test for how often alternate alleles are called by  
2 reads aligned to the + versus the – strand of the reference genome; a large bias might be expected if for  
3 example a nearby transposable element insertion relative to the reference genome influenced read  
4 alignments on one strand and would make the genotypes at that site unreliable. We further required that  
5 the absolute value for the Z-score associated with the read position rank sum, the mapping quality rank  
6 sum, and the base quality rank sum be above 4. These statistics quantify how biased the reference allele  
7 alignments relative to those of non-reference alleles for the relevant filters. For example, the first filter  
8 —read position rank sum—quantifies whether non-reference alleles are generally found further  
9 forward or backward in a short read. This filter may also reflect errors due to systematic differences in  
10 alignments of non-reference allele bearing reads (*e.g.* due to indels on one of the chromosomes present  
11 in an individual). See the GATK [62] documentation for in-depth descriptions of the relevant filters  
12 used. We applied these criteria to both DNA and RNA based libraries. Summaries of sites aligned and  
13 filtered for each genome are available in Supplemental Table S11, and a schematic of our pipeline is  
14 presented in Supplemental Figure S1.

### 15 *Homo sapiens*

16 Rather than recompute variant calls, for the human data, we obtained VCF files for the Yoruban  
17 population from [38]. We elected to do this because these data are exceedingly well curated and the  
18 size of the human variation raw data presents a practical computational challenge. The VCF file was  
19 treated as described below in all case.

### 20 *Estimating genetic diversity in genomic windows*

21 From these filtered files, we computed genetic diversity as  $\pi$ , the average number of pairwise  
22 differences [65], at four-fold degenerate sites in non-overlapping windows of 100kb, 500kb, or 1000kb.  
23 In all cases, we excluded windows from our analysis with fewer than 500 sequenced four-fold

1 degenerate sites. We also exclude all windows on sex chromosomes, in order to avoid complicating  
2 effects of hemizyosity on patterns of polymorphism.

### 3 **3. Recombination rate estimation pipeline**

4 Our approach to estimating recombination rates is to first obtain sequence information and  
5 genetic map positions for markers from the literature, map markers to the genome sequence where  
6 necessary, filter duplicate and incongruent markers, and finally estimate recombination rates from the  
7 relationship between physical position and genetic position. Specific details of map construction for  
8 each species are described in Supplemental Text S1.

#### 9 *Data curation and mapping markers to the reference genome*

10 We used three basic approaches to link markers from genetic maps to sequence coordinates. In  
11 some cases, sequence coordinates are available from the literature, in which case we use previously  
12 published values (in some cases updated to the latest version of the genome reference). For cases where  
13 primer information (but not full sequence information) is available, we used ePCR [66] with options  
14 -g1 -n2 -d50-500 and keeping all successful mappings, except where noted. For cases where locus  
15 sequence information is available, we used blastn with an e-value cutoff of  $10^{-8}$  and retain the top 8  
16 hits for each marker, except where noted. In both cases, we only retain positions where the sequence  
17 chromosome and the genetic map chromosome are identical. Specific curation and data cleaning steps  
18 for individual species are summarized in Supplemental Table S12 and described in more detail in  
19 Supplemental Text S1.

#### 20 *Removal of incorrectly ordered or duplicated markers*

21 For most species, the genetic position and physical position of markers along a chromosome are  
22 not completely congruently ordered. That is, physical position is typically not strictly monotonically

1 increasingly with genetic position. Incongruent markers can arise from incorrect genome assemblies,  
2 errors in map construction, or sequence rearrangements between the reference genome and the  
3 mapping population.

4 For consistency, we assume that the reference genome is correctly assembled, and we correct  
5 the order and orientation of genetic maps to be consistent with the sequence assembly. To remove  
6 incongruent markers, we find the longest common subsequence (LCS) of ranked genetic and physical  
7 positions, and define as incongruent all markers that are not part of the LCS. After removing  
8 incongruent markers, we filtered each map to retain only the single most congruent mapping position  
9 for markers with multiple possible genomic locations. Functions to perform this analysis in R are  
10 available at the GitHub page associated with this manuscript.

### 11 *Masking low quality map regions*

12 To improve the quality of our recombination rate estimation, we designed a masking filter to  
13 exclude regions of chromosomes where the fit between the genetic map and the physical position of  
14 markers is particularly poor, defined as a run of 5 bad markers (for chromosomes with at least 25  
15 markers), or a run of 0.2 times the number of markers on the chromosome, rounded up, bad markers  
16 (for chromosomes with at fewer than 25 markers). We also completely mask any chromosome with  
17 fewer than 5 markers in total. The final map quality and various filtering results are summarized in  
18 Supplemental Table S13.

### 19 *Recombination rate estimation*

20 Our basic approach to recombination rate estimation is to fit a continuous function to the Marey  
21 map relating genetic position and physical position for each chromosome. We use two different  
22 approaches that result in different degrees of smoothing: a polynomial fit and a linear B-spline fit. In

1 both cases, we start by optimizing the polynomial degree or spline degrees of freedom using a custom  
2 R function that maximizes the Akaike Information Criteria (AIC) for the model fit. For the polynomial  
3 fit, we optimize between degree 1 and degree  $\max(3, \min(20, \# \text{ markers} / 3))$ . For the B-spline fit, we  
4 optimize degrees of freedom between df 1 and  $\min(100, \max(2, \# \text{ markers} / 2))$ . In each case, we retain  
5 the value with the highest AIC. To compute recombination rates in cM/Mb, we then take the derivative  
6 of the fitted function, evaluated at the midpoint of each window. For additional smoothing, we set all  
7 values of recombination estimated below 0 to 0, and all values above the 99th percentile to the 99th  
8 percentile. While the two estimates tend to be highly correlated with each other, the polynomial fit  
9 appears to perform better for low quality maps, and the B-spline fit for high quality maps. Therefore,  
10 unless otherwise noted, we use the polynomial estimates of recombination rate for maps with inter-  
11 marker spacing of greater than 2 cM, and the B-spline estimates for maps with inter-marker spacing  
12 less than or equal to 2 cM. All estimation was done in R; code is available at the GitHub page  
13 associated with this manuscript.

#### 14 *Partial correlations between recombination rate and genetic diversity*

15 To estimate the strength of the association between recombination rate and genetic diversity, we  
16 use partial correlations that account for variation in coding sequence density across the genome. In  
17 many species [26,40] recombination rate and/or neutral diversity is correlated with gene density, and  
18 thus we need to account for this confounding variable in our analysis. We do this using partial  
19 correlations, implemented with the ppcor package in R.

20 First, we estimate coding sequence density in each window as the fraction of each window  
21 represented by CDS sites, extracted from the same GFF files for each species used to compute four-  
22 fold degenerate sites. We then estimate Kendall's  $\tau$  between recombination rate and genetic diversity  
23 for each window after correcting for coding sequence density.



#### 1 4. Modeling the joint effects of background selection and hitchhiking on neutral diversity

2 We begin with the very general selective sweep model derived by Coop and Ralph [41], which  
3 captures a broad variety of hitchhiking dynamics. To include the effects of background selection, we  
4 rely on the fact that to a first approximation, background selection can be thought of as reducing the  
5 effective population size and therefore increasing the rate of coalescence. This effect can be  
6 incorporated by a relatively simple modification to equation 16 of [41]. Specifically, we scale  $N$  by a  
7 BGS parameter,  $\exp(-G)$ , in equation 16, which then leads to a new expectation of average pairwise  
8 genetic diversity ( $\pi$ ):

$$10 \quad E[\pi] = \frac{\theta}{1/\exp(-G) + \alpha/rbp} \quad \text{[Equation 1]}$$

11  
12 where  $\alpha = 2N * V_{bp} * J_{2,2}$  (per [41]) and  $rbp$  is the recombination rate per base pair. This is very  
13 similar to previously published models of the joint effects of background selection and hitchhiking  
14 (e.g. [39]). To account for variation in the density of targets of selection, we build upon the approach of  
15 Rockman *et al.* [40] and Flowers *et al.* [26], which derives from the work Hudson, Kaplan,  
16 Charlesworth and others that originally described models of background selection in recombining  
17 genomes [17,18]. Specifically, we fit the following model to estimate  $G$  for each window  $i$ :

$$19 \quad G_i = \sum_k \frac{U * fd_i * sh}{2 * (sh + P |M_i - M_k|) * (sh + P |M_i - M_{k+1}|)} \quad \text{[Equation 2]}$$

20

1 where  $U$  is the total genomic deleterious mutation rate,  $fd_i$  is the functional density of window  $i$ ,  $sh$  is a  
2 compound parameter capturing both dominance and the strength of selection against deleterious  
3 mutations,  $M_k$  and  $M_i$  are the genetic positions in Morgans of window  $k$  and window  $i$  respectively, and  
4  $P$  is the index of panmixis, which allows us to account for the effects of selfing. We estimate functional  
5 density as the fraction of exonic coding sites in the genome that fall within the window in question. We  
6 focus on exonic coding sites as a proxy for targets of selection as they are the only functional measure  
7 that is uniformly available for all the species in our study.

8         Because  $P$ ,  $U$ , and  $sh$  are not known, we fit this BGS model with a variety of parameter  
9 combinations. As  $U$  is generally unknown, and estimating  $U$  is difficult in most cases (*e.g.* [67,68]), we  
10 fit our models with three different values:  $U_{min}$ , where we assume  $U$  is equal to the mutation rate times  
11 the number of exonic protein-coding bases in the genome;  $U_{const}$ , where we assume that  $U$  is equal to  
12 1 for all species; and  $U_{max}$  where we assume that  $U$  is equal the lesser of the mutation rate times 5  
13 times the number of exonic protein-coding bases in the genome or the mutation rate times the genome  
14 size.  $U_{min}$  and  $U_{max}$  are multiplied by 2 to convert to diploid estimates. We believe that these  
15 estimates of  $U$  should roughly span the reasonable range for most species.  $U_{min}$  is likely to  
16 underestimate the true deleterious mutation rate as the number of exonic protein-coding bases will  
17 typically underestimate the number of evolutionarily conserved bases in a genome.  $U_{max}$  assumes that  
18 20% of conserved bases are exonic coding bases and 80% are non-coding, which we admit is a  
19 relatively arbitrary assumption, but likely close to the maximum plausible  $U$ .

20         For  $P$ , we assume 1 for all vertebrates, insects, and obligate outcrossers among plants; 0.04 for  
21 highly selfing species, and 0.68 for partial selfers. These estimates correspond to selfing rates of 0%,  
22 ~98%, and ~50%, respectively. Estimates of selfing are available in Supplemental Table S14. For a few  
23 species of plants we were unable to obtain reliable estimates of selfing rate (indicated by NA in

1 Supplemental Table S14), and in this case we include all estimates of P in our model selection approach  
2 below. For sh, we fit a range of values evenly spaced (on a log scale) between 1e-5 and 0.1. Code to  
3 estimate  $G_i$  was implemented in C++ and is available from the GitHub repository associated with this  
4 manuscript.

5 To incorporate functional density into the hitchhiking component of the model, we make the  
6 simplifying assumption that sweeps targeting selected sites outside a window will have little effect on  
7 neutral diversity within a window, and that sweeps occur uniformly within a window. Under this  
8 assumption, we can consider functional density as a scaling factor on the rate of sweeps,  $V_{bp}$ .  
9 Specifically, we reparameterize the rate of sweeps,  $V_{bp}$ , as  $V$ , the total sweeps per genome, and then  
10 consider the fraction of sweeps that occur in a particular window  $i$  as  $V * fd(i)$ . This results in a simple  
11 scaling of alpha in equation 1. While we note that this assumption is likely to be violated in practice, it  
12 allows use to use the homogeneous sweep model of [41] with different rates of sweeps for each  
13 window across the genome. Ultimately, of course, it would be preferable to derive a non-homogenous  
14 sweep model that directly incorporates variation in functional density, but doing so is beyond the scope  
15 of this manuscript. However, we believe that our simplifying is likely adequate, as the largest reduction  
16 in diversity associated with a sweep is localized to the window containing the swept site (*e.g.*, [41]).

17 Incorporating the effects of functional density in both BGS and HH, our final model for the  
18 expectation of neutral diversity in window  $i$  is:

19

$$20 \quad E[\pi_i] = \frac{\theta_{neutral}}{1/\exp(-G_i) + \alpha * fd_i / rbp_i} \quad \text{[Equation 3]}$$

21

22 To obtain an estimate of the effect of selection for each species, we fit this model for estimates

1 of  $G_i$  derived from different parameter combinations (see above), using the `nlsLM()` function from the  
2 `minpack.lm` package in R. In addition, we fit three simpler models: a background selection only model  
3 (in which  $\alpha$  is 0 and thus the second part of the denominator is null), a hitchhiking only model (in  
4 which  $G$  is 0 for all  $i$ , and thus the first part of the denominator is null), and a neutral model in which  
5 both  $G$  and  $\alpha$  are 0, and thus the model predicts that neutral genetic diversity is equal to mean  
6 genetic diversity across the genome. Together, we refer to these four models as model set 1. Finally, we  
7 fit a second set of models (model set 2) in which we use the same approach to model background  
8 selection, but use homogenous hitch-hiking model of [41] without modification to allow for variation  
9 in functional density across the genome, and thus remove the  $fd_i$  term from equation 3.

10 From each model fit we estimate  $\theta$ [neutral] for all four models (full, BGS-only, HH-only,  
11 neutral), and also extract the likelihood of the fit. We then compute the AIC for each parameter  
12 combination, extract the fit with the best AIC for each model, and use the AIC to estimate the Akaike  
13 weight (relative likelihood) of each model  $j$  as

14

$$15 \quad REL_j = e^{(AIC_{min} - AIC_j)/2} \quad \text{[Equation 4]}$$

16

17 which we then normalize so that the weights for all four models within a for a species sum to 1. We  
18 focus on AIC as it provides a straightforward way to compare non-nested models.

19 We estimate neutral genetic diversity for each species as the parameter value obtained by the  
20 model with the best AIC. We then compute average observed genetic diversity for each species, and  
21 report the magnitude of the impact of selection on linked neutral diversity as  $1 - (\text{observed}/\text{neutral})$ .  
22 Values below 0 are replaced by 0. This value can be interpreted as the proportion of neutral variation

1 removed by selection acting on linked sites, averaged across the genome.

2         This modeling approach has some important limitations: in particular, our approach calculates  
3 the effects of BGS and HH in windows across the genome instead of per base and we use the parameter  
4 *sh* instead of integrating across the distribution of fitness effects (as is done in *e.g.* [48,50]).  
5 Additionally, we do not use information such as locations of amino acid fixations, as is used by *e.g.*  
6 [49]. We fully acknowledge that these simplifying assumptions will, to a certain extent, degrade the  
7 accuracy of our modeling approach compared to other possible approaches. We argue, however, that  
8 these assumptions are necessary for this work: more sophisticated models typically require additional  
9 data (*e.g.*, the distribution of fitness effects of new mutations or the location of recent amino acid  
10 fixations), or significantly increased computational time (*i.e.*, by computing the effects of background  
11 selection at each base instead of in windows). For most of the species we studied, the necessary  
12 additional data are not clearly available to fit more complex models, and the increased computational  
13 time to per-base models would rapidly make our analysis computationally intractable. Thus, we believe  
14 that we have made reasonable tradeoffs between modeling complexity, data availability and taxonomic  
15 breadth.

## 16 **5. Linear models**

17         Our goal is to test whether  $N_c$  predicts the degree to which selection shapes patterns of neutral  
18 diversity, using log-transformed measures of body size and geographic range as proxies for  $N_c$ .  
19 However, many other factors could potentially influence our measure of strength of selection, including  
20 biological factors such as genome size and average recombination rate; and experimental factors such  
21 as map quality and assembly quality. In particular, we might expect to underestimate the strength of  
22 selection in species with low-quality assemblies or maps, and we might expect that on average larger  
23 genomes and higher recombination rates would reduce the impact of selection.

1           In order to account for these parameters that are not directly of interest, we use two approaches.  
2   First, we compare a model that includes both our parameters of interest and our parameters not directly  
3   of interest to a model that includes only the parameters not directly of interest, in order to test whether  
4   our proxies for  $N_c$  result in a significantly better fit. Second, we fit our proxies for  $N_c$  to the residuals  
5   of a linear model including only parameters not directly of interest, in order to determine how much  
6   variation proxies for  $N_c$  explain after accounting for all the variation that can be explained by genome  
7   size, average recombination rate, and quality parameters.

8           We obtain assembly quality from NCBI, Phytozome, the original genome publication, or  
9   compute it directly from fasta files. C-values for plants come from <http://data.kew.org/cvalues/>, and C-  
10   values for animals come from <http://www.genomesize.com/>. In all cases, most recent estimates,  
11   "prime" estimates, or flow cytometry estimates are preferred; where several seemingly equally good  
12   estimates are available, the average is used. In some rare cases a related species is used instead of the  
13   sequenced species if the sequenced C-value is not available. We focus on C-values instead of assembly  
14   size as using assembly size as a measure of genome size confounds genome size and assembly quality  
15   (lower quality assemblies will be on average less complete and therefore smaller). Assembly  
16   parameters and sources are listed in Supplemental Table S15. Average recombination rate computed as  
17   the overall map size divided by the size of the genome covered by the map.

18           In order to determine which interactions among proxies for  $N_c$  (size, range, and kingdom) to  
19   include, we start with the full model including all interactions and remove all non-significant  
20   interactions. After doing so, we our model is

21

22   selection strength  $\sim \log_{10}(\text{size}) + \log_{10}(\text{range}) + \text{kingdom} + \log_{10}(\text{size}):\text{kingdom}$    [equation 5]

## 1 **6. Data accessibility**

2           The data we analyze in this manuscript, and the scripts we used to produce our results, are  
3 available as follows. All genomes, polymorphism datasets, and GFF annotation files are publicly  
4 available from NCBI or other sources. Genome references and versions are listed in Table S1, and  
5 URLs pointing to the location of genome sequence and GFF annotations are available in Table S2. SRA  
6 accessions for polymorphism datasets are listed in Table S10, and references for polymorphism  
7 datasets, where available, are listed in Table S1. Genetic maps for each species are available from the  
8 references listed in Table S1, or as an R data file available at the GitHub page associated with this  
9 manuscript (<https://github.com/tsackton/linked-selection>). All Perl scripts, R scripts, and C++ code  
10 associated with this manuscript is available from GitHub (<https://github.com/tsackton/linked-selection>),  
11 and the function of each piece of code is documented both in comments in the code itself and in the  
12 Github README. Programs used for read mapping and genotyping, along with command line  
13 parameters, are described in the methods. The GitHub page also provides several intermediate data  
14 files, including range and size data for each species, neutral diversity and recombination rate for 100kb,  
15 500kb, and 1000kb windows across each species, and the final dataset analyzed with the linear models  
16 described above.

17

18 **Acknowledgements:** The authors acknowledge helpful comments and advice from Daven Presgraves,  
19 Joshua Schraiber, Rasmus Nielsen, Chuck Langley, John Wakeley, Graham Coop, Andrew Berry,  
20 Andrew Clark, Julien Ayroles, Shelbi Russell, Brian Arnold, and Jacob Crawford, as well as three  
21 anonymous reviewers whose comments greatly improved the manuscript. The computations in this  
22 paper were run on the Odyssey cluster supported by the FAS Division of Science, Research Computing  
23 Group at Harvard University.

1

2 **Author Contributions:** RBC-D and TBS conceived and designed this study, processed and analyzed  
3 the data, and wrote the manuscript. DLH offered advice and contributed to writing the manuscript. All  
4 authors read and approved the final version.

5

6 **References:**

- 7 1. Pool JE, Hellmann I, Jensen JD, Nielsen R (2010) Population genetic inference from genomic  
8 sequence variation. *Genome Research* 20: 291–300. doi:10.1101/gr.079509.108.
- 9 2. Kellis M, Wold B, Snyder MP, Bernstein BE, Kundaje A, et al. (2014) Defining functional DNA  
10 elements in the human genome. *Proceedings of the National Academy of Sciences* 111: 6131–  
11 6138. doi:10.1073/pnas.1318948111.
- 12 3. Nielsen R (2005) Molecular signatures of natural selection. *Annu Rev Genet* 39: 197–218.  
13 doi:10.1146/annurev.genet.39.073003.112420.
- 14 4. McCarthy MI, Abecasis GR, Cardon LR, Goldstein DB, Little J, et al. (2008) Genome-wide as-  
15 sociation studies for complex traits: consensus, uncertainty and challenges. *Nat Rev Genet* 9:  
16 356–369. doi:10.1038/nrg2344.
- 17 5. Allendorf FW, Hohenlohe PA, Luikart G (2010) Genomics and the future of conservation genet-  
18 ics. *Nature Publishing Group* 11: 697–709. doi:10.1038/nrg2844.
- 19 6. Lewontin RC (1974) *The Genetic Basis of Evolutionary Change*. 1 pp.
- 20 7. Gillespie JH (2000) Genetic Drift in an Infinite Population: The Pseudohitchhiking Model. *Ge-  
21 netics* 155: 909–919.
- 22 8. Leffler EM, Bullaughey K, Matute DR, Meyer WK, Ségurel L, et al. (2012) Revisiting an Old  
23 Riddle: What Determines Genetic Diversity Levels within Species? *PLoS Biol* 10: e1001388.  
24 doi:10.1371/journal.pbio.1001388.
- 25 9. Nevo E, Beiles A, Ben-Shlomo R (1984) The evolutionary significance of genetic diversity: eco-  
26 logical, demographic and life history correlates.
- 27 10. Lynch M (2008) The Cellular, Developmental and Population-Genetic Determinants of Muta-  
28 tion-Rate Evolution. *Genetics* 180: 933–943. doi:10.1534/genetics.108.090456.
- 29 11. Hedrick P (2005) Large variance in reproductive success and the  $N_e/N$  ratio. *Evolution* 59: 1596–  
30 1599. doi:10.1111/j.0014-3820.2005.tb01809.x.



- 1 12. Vucetich JA, Waite TA, Nunney L (1997) Fluctuating population size and the ratio of effective to  
2 census population size. *Evolution* 51: 2017. doi:10.2307/2411022.
- 3 13. Romiguier J, Gayral P, Ballenghien M, Bernard A, Cahais V, et al. (2014) Comparative popula-  
4 tion genomics in animals uncovers the determinants of genetic diversity. *Nature* 515: 261–263.  
5 doi:10.1038/nature13685.
- 6 14. Gillespie JH (2001) Is the population size of a species relevant to evolution? *Evolution* 55:  
7 2161–2169. doi:10.1111/j.0014-3820.2001.tb00732.x.
- 8 15. Smith JM, Haigh J (1974) The hitch-hiking effect of a favourable gene. *Genetical research* 23:  
9 23–35.
- 10 16. Kaplan NL, Hudson RR, Langley CH (1989) The “hitchhiking effect” revisited. *Genetics* 123:  
11 887–899.
- 12 17. Charlesworth B, Morgan MT, Charlesworth D (1993) The effect of deleterious mutations on  
13 neutral molecular variation. *Genetics* 134: 1289–1303.
- 14 18. Hudson RR, Kaplan NL (1995) Deleterious background selection with recombination. *Genetics*  
15 141: 1605–1617.
- 16 19. Neher RA, Kessinger TA (2013) Coalescence and genetic diversity in sexual populations under  
17 selection. doi:10.1073/pnas.1309697110/-/DCSupplemental.
- 18 20. Sella G, Petrov DA, Przeworski M, Andolfatto P (2009) Pervasive Natural Selection in the  
19 *Drosophila* Genome? *PLoS Genetics* 5: e1000495. doi:10.1371/journal.pgen.1000495.
- 20 21. Begun DJ, Aquadro CF (1992) Levels of naturally occurring DNA polymorphism correlate with  
21 recombination rates in *D. melanogaster*. *Nature* 356: 519–520. doi:10.1038/356519a0.
- 22 22. Cai JJ, Macpherson JM, Sella G, Petrov DA (2009) Pervasive Hitchhiking at Coding and Regu-  
23 latory Sites in Humans. *PLoS Genetics* 5: e1000336. doi:10.1371/journal.pgen.1000336.
- 24 23. Macpherson JM, Sella G, Davis JC, Petrov DA (2007) Genomewide Spatial Correspondence Be-  
25 tween Nonsynonymous Divergence and Neutral Polymorphism Reveals Extensive Adaptation in  
26 *Drosophila*. *Genetics* 177: 2083–2099. doi:10.1534/genetics.107.080226.
- 27 24. Nachman MW, Bauer VL, Crowell SL, Aquadro CF (1998) DNA Variability and Recombination  
28 Rates at X-Linked Loci in Humans. *Genetics* 150: 1133–1141.
- 29 25. McGaugh SE, Heil CSS, Manzano-Winkler B, Loewe L, Goldstein S, et al. (2012) Recombina-  
30 tion Modulates How Selection Affects Linked Sites in *Drosophila*. *PLoS Biol* 10: e1001422.  
31 doi:10.1371/journal.pbio.1001422.
- 32 26. Flowers JM, Molina J, Rubinstein S, Huang P, Schaal BA, et al. (2012) Natural Selection in  
33 Gene-Dense Regions Shapes the Genomic Pattern of Polymorphism in Wild and Domesticated  
34 Rice. *Molecular Biology and Evolution* 29: 675–687. doi:10.1093/molbev/msr225.

- 1 27. Cutter AD, Payseur BA (2013) Genomic signatures of selection at linked sites: unifying the dis-  
2 parity among species. *Nature Publishing Group* 14: 262–274. doi:10.1038/nrg3425.
- 3 28. Lohmueller KE, Albrechtsen A, Li Y, Kim SY, Korneliussen T, et al. (2011) Natural Selection  
4 Affects Multiple Aspects of Genetic Variation at Putatively Neutral Sites across the Human  
5 Genome. *PLoS Genetics* 7: e1002326. doi:10.1371/journal.pgen.1002326.
- 6 29. Boyko AR, Williamson SH, Indap AR, Degenhardt JD, Hernandez RD, et al. (2008) Assessing  
7 the Evolutionary Impact of Amino Acid Mutations in the Human Genome. *PLoS Genetics* 4:  
8 e1000083. doi:10.1371/journal.pgen.1000083.
- 9 30. Elyashiv E, Bullaughey K, Sattath S, Rinott Y, Przeworski M, et al. (2010) Shifts in the intensity  
10 of purifying selection: An analysis of genome-wide polymorphism data from two closely related  
11 yeast species. *Genome Research* 20: 1558–1573. doi:10.1101/gr.108993.110.
- 12 31. Gossman TI, Song BH, Windsor AJ, Mitchell-Olds T, Dixon CJ, et al. (2010) Genome Wide  
13 Analyses Reveal Little Evidence for Adaptive Evolution in Many Plant Species. *Molecular Biol-  
14 ogy and Evolution* 27: 1822–1832. doi:10.1093/molbev/msq079.
- 15 32. Begun DJ, Holloway AK, Stevens K, Hillier LW, Poh Y-P, et al. (2007) Population Genomics:  
16 Whole-Genome Analysis of Polymorphism and Divergence in *Drosophila simulans*. *PLoS Biol*  
17 5: e310. doi:10.1371/journal.pbio.0050310.
- 18 33. Andolfatto P (2007) Hitchhiking effects of recurrent beneficial amino acid substitutions in the  
19 *Drosophila melanogaster* genome. *Genome Research* 17: 1755–1762. doi:10.1101/gr.6691007.
- 20 34. Halligan DL, Kousathanas A, Ness RW, Harr B, Eöry L, et al. (2013) Contributions of Protein-  
21 Coding and Regulatory Change to Adaptive Molecular Evolution in Murid Rodents. *PLoS Ge-  
22 netics* 9: e1003995. doi:10.1371/journal.pgen.1003995.
- 23 35. Slotte T, Foxe JP, Hazzouri KM, Wright SI (2010) Genome-Wide Evidence for Efficient Positive  
24 and Purifying Selection in *Capsella grandiflora*, a Plant Species with a Large Effective Popula-  
25 tion Size. *Molecular Biology and Evolution* 27: 1813–1821. doi:10.1093/molbev/msq062.
- 26 36. Langley CH, Stevens K, Cardeno C, Lee YCG, Schrider DR, et al. (2012) Genomic Variation in  
27 Natural Populations of *Drosophila melanogaster*. *Genetics* 192: 533–598.  
28 doi:10.1534/genetics.112.142018.
- 29 37. Bazin E (2006) Population Size Does Not Influence Mitochondrial Genetic Diversity in Ani-  
30 mals. *Science* 312: 570–572. doi:10.1126/science.1122033.
- 31 38. The 1000 Genomes Project Consortium, et al. (2013) An integrated map of genetic variation  
32 from 1,092 human genomes. *Nature* 490: 56–65. doi:10.1038/nature11632.
- 33 39. Kim Y, Stephan W (2000) Joint Effects of Genetic Hitchhiking and Background Selection on  
34 Neutral Variation. *Genetics* 155: 1415–1427.
- 35 40. Rockman MV, Skrovaneck SS, Kruglyak L (2010) Selection at linked sites shapes heritable phe-

- 1 notypic variation in *C. elegans*. *Science*. doi:10.1126/science.1192430.
- 2 41. Coop G, Ralph P (2012) Patterns of Neutral Diversity Under General Models of Selective  
3 Sweeps. *Genetics* 192: 205–224. doi:10.1534/genetics.112.141861.
- 4 42. Schmid PE, Tokeshi M, Schmid-Araya JM (2000) Relation Between Population Density and  
5 Body Size in Stream Communities. *Science* 289: 1557–1560.  
6 doi:10.1126/science.289.5484.1557.
- 7 43. Damuth J (1981) Population density and body size in mammals. *Nature* 290: 699–700.  
8 doi:10.1038/290699a0.
- 9 44. Enquist BJ, Brown JH, West GB (1998) Allometric scaling of plant energetics and population  
10 density. *Nature* 395: 163–165. doi:10.1038/25977.
- 11 45. Lercher MJ, Hurst LD (2002) Human SNP variability and mutation rate are higher in regions of  
12 high recombination. *Trends in genetics* 18: 337–340. doi:10.1016/S0168-9525(02)02669-0.
- 13 46. Hellmann I, Ebersberger I, Ptak SE, Pääbo S (2003) A neutral explanation for the correlation of  
14 diversity with recombination rates in humans. *The American Journal of ...* 72: 1527–1535.  
15 doi:10.1086/375657.
- 16 47. Cutter AD, Choi JY (2010) Natural selection shapes nucleotide polymorphism across the  
17 genome of the nematode *Caenorhabditis briggsae*. *Genome Research* 20: 1103–1111.  
18 doi:10.1101/gr.104331.109.
- 19 48. McVicker G, Gordon D, Davis C, Green P (2009) Widespread Genomic Signatures of Natural  
20 Selection in Hominid Evolution. *PLoS Genetics* 5: e1000471.  
21 doi:10.1371/journal.pgen.1000471.
- 22 49. Elyashiv E, Sattath S, Hu TT, Strustovsky A, McVicker G, et al. (2014) A genomic map of the  
23 effects of linked selection in *Drosophila*. arXiv 1408.5461.
- 24 50. Comeron JM (2014) Background Selection as Baseline for Nucleotide Variation across the  
25 *Drosophila* Genome. *PLoS Genetics* 10: e1004434. doi:10.1371/journal.pgen.1004434.
- 26 51. Kimura M (1968) Evolutionary rate at the molecular level. *Nature*. 217.5129: 624-626.
- 27 52. Kimura M (1984) *The neutral theory of molecular evolution*. Cambridge University Press.
- 28 53. Ohta T (1992) The nearly neutral theory of molecular evolution. *Annual Review of Ecology and*  
29 *Systematics*. 263-286 doi:10.2307/2097289.
- 30 54. Polechová J, Barton N, Marion G (2009) Species' range: adaptation in space and time. *The*  
31 *American Naturalist* 174: E186–E204. doi:10.1086/605958.
- 32 55. Ralph P, Coop G (2010) Parallel Adaptation: One or Many Waves of Advance of an Advanta-  
33 geous Allele? *Genetics* 186: 647–668. doi:10.1534/genetics.110.119594.
- 34  
35

- 1 56. Slatkin M (1987) Gene flow and the geographic structure of natural populations. *Science* 236:  
2 787–792.
- 3 57. Burgman MA, Fox JC (2003) Bias in species range estimates from minimum convex polygons:  
4 implications for conservation and options for improved planning. *Animal Conservation* 6: 19–  
5 28. doi:10.1017/S1367943003003044.
- 6 58. Lindberg MS (2012) A review of designs for capture–mark–recapture studies in discrete time.  
7 *Journal of Ornithology* 152: 355–370.
- 8 59. Li H, Durbin R (2009) Fast and accurate short read alignment with Burrows-Wheeler transform.  
9 *Bioinformatics* 25: 1754–1760. doi:10.1093/bioinformatics/btp324.
- 10 60. Kim D, Pertea G, Trapnell C, Pimentel H, Kelley R, et al. (2013) TopHat2: accurate alignment of  
11 transcriptomes in the presence of insertions, deletions and gene fusions. *Genome Biology* 14:  
12 R36. doi:10.1186/gb-2013-14-4-r36.
- 13 61. Lunter G, Goodson M (2011) Stampy: A statistical algorithm for sensitive and fast mapping of  
14 Illumina sequence reads. *Genome Research* 21: 936–939. doi:10.1101/gr.111120.110.
- 15 62. DePristo MA, Banks E, Poplin R, Garimella KV, Maguire JR, et al. (2011) A framework for  
16 variation discovery and genotyping using next-generation DNA sequencing data. *Nat Genet* 43:  
17 491–498. doi:10.1038/ng.806.
- 18 63. Shields DC, Sharp PM, Higgins DG, Wright F (1988) “Silent” sites in *Drosophila* genes are not  
19 neutral: evidence of selection among synonymous codons. *Molecular Biology and Evolution* 5:  
20 704–716.
- 21 64. Lawrie DS, Messer PW, Hershberg R, Petrov DA (2013) Strong Purifying Selection at Synony-  
22 mous Sites in *D. melanogaster*. *PLoS Genetics* 9: e1003527. doi:10.1371/journal.pgen.1003527.
- 23 65. Tajima F (1983) Evolutionary relationship of DNA sequences in finite populations. *Genetics*  
24 105: 437–460.
- 25 66. Schuler GD (1997) Sequence Mapping by Electronic PCR. *Genome Research* 7: 541–550.  
26 doi:10.1101/gr.7.5.541.
- 27 67. Baer CF, Miyamoto MM, Denver DR (2007) Mutation rate variation in multicellular eukaryotes:  
28 causes and consequences. *Nat Rev Genet* 8: 619–631. doi:10.1038/nrg2158.
- 29 68. Haag-Liautard C, Dorris M, Maside X, Macaskill S, Halligan DL, et al. (2007) Direct estimation  
30 of per nucleotide and genomic deleterious mutation rates in *Drosophila*. *Nature* 445: 82–85.  
31 doi:10.1038/nature05388.

32

33

1 **Financial Disclosure:**

- 2 This work was supported in part by NIH grant R01GM084236 to DLH. During this work, RBC-D was  
3 supported by Harvard Prize Graduate Fellowship and a UCB Chancellor's Postdoctoral Fellowship.

1 **Tables**

2 Table 1: List of species used in this work

| Species                                      | Common Name              | Kingdom  | Subgroup     |
|----------------------------------------------|--------------------------|----------|--------------|
| <i>Anopheles gambiae</i>                     | African malaria mosquito | Animalia | Invertebrate |
| <i>Apis mellifera scutellata</i>             | Honeybee                 | Animalia | Invertebrate |
| <i>Arabidopsis thaliana</i>                  | Thale cress              | Plantae  | Herbaceous   |
| <i>Bombyx mandarina</i>                      | Silkworm                 | Animalia | Invertebrate |
| <i>Bos taurus</i>                            | Cow                      | Animalia | Vertebrate   |
| <i>Brachypodium distachyon</i>               | Purple false brome       | Plantae  | Herbaceous   |
| <i>Caenorhabditis briggsae</i>               | Roundworm                | Animalia | Invertebrate |
| <i>Caenorhabditis elegans</i>                | Roundworm                | Animalia | Invertebrate |
| <i>Canis lupus</i>                           | Wolf                     | Animalia | Vertebrate   |
| <i>Capsella rubella</i>                      | Pink Shepherd's Purse    | Plantae  | Herbaceous   |
| <i>Citrullus lanatus lanatus</i>             | Watermelon               | Plantae  | Herbaceous   |
| <i>Citrus reticulata</i>                     | Mandarin Orange          | Plantae  | Woody        |
| <i>Cucumis sativus var. hardwickii</i>       | Cucumber                 | Plantae  | Herbaceous   |
| <i>Cynoglossus semilaevis</i>                | Tongue sole              | Animalia | Vertebrate   |
| <i>Danio rerio</i>                           | Zebrafish                | Animalia | Vertebrate   |
| <i>Drosophila melanogaster</i>               | Fruitfly                 | Animalia | Invertebrate |
| <i>Drosophila pseudoobscura</i>              | Fruitfly                 | Animalia | Invertebrate |
| <i>Equus ferus przewalskii</i>               | Prewalksii's horse       | Animalia | Vertebrate   |
| <i>Ficedula albicollis</i>                   | Collared flycatcher      | Animalia | Vertebrate   |
| <i>Gallus gallus</i>                         | Chicken                  | Animalia | Vertebrate   |
| <i>Gasterosteus aculeatus</i>                | Stickleback              | Animalia | Vertebrate   |
| <i>Glycine soja</i>                          | Wild soybean             | Plantae  | Herbaceous   |
| <i>Gossypium raimondii</i>                   | New world cotton         | Plantae  | Woody        |
| <i>Heliconius melpomene melpomene</i>        | Postman butterfly        | Animalia | Invertebrate |
| <i>Homo sapiens</i>                          | Human                    | Animalia | Vertebrate   |
| <i>Lepisosteus oculatus</i>                  | Spotted gar              | Animalia | Vertebrate   |
| <i>Macaca mulatta</i>                        | Rhesus macaque           | Animalia | Vertebrate   |
| <i>Medicago truncatula</i>                   | Barrel medic             | Plantae  | Herbaceous   |
| <i>Meleagris gallopavo</i>                   | Turkey                   | Animalia | Vertebrate   |
| <i>Mus musculus castaneus</i>                | House mouse              | Animalia | Vertebrate   |
| <i>Oryza rufipogon</i>                       | Wild rice                | Plantae  | Herbaceous   |
| <i>Oryzias latipes</i>                       | Medaka                   | Animalia | Vertebrate   |
| <i>Ovis canadensis</i>                       | Bighorn sheep            | Animalia | Vertebrate   |
| <i>Papio anubis</i>                          | Olive baboon             | Animalia | Vertebrate   |
| <i>Populus trichocarpa</i>                   | Black cottonwood         | Plantae  | Woody        |
| <i>Prunus davidiana</i>                      | David's peach            | Plantae  | Woody        |
| <i>Setaria italica</i>                       | Foxtail millet           | Plantae  | Herbaceous   |
| <i>Sorghum bicolor ssp. verticilliflorum</i> | Wild Sudan grass         | Plantae  | Herbaceous   |
| <i>Sus scrofa</i>                            | Wild boar                | Animalia | Vertebrate   |
| <i>Zea mays ssp. parviglumis</i>             | Teosinte                 | Plantae  | Herbaceous   |

1 Table 2: Linear model fit for the main model

|                                    | Estimate | Std. Error | t value | Pr(> t ) |
|------------------------------------|----------|------------|---------|----------|
| (Intercept)                        | -0.71408 | 0.18282    | -3.906  | 0.000410 |
| Log <sub>10</sub> (range)          | 0.11239  | 0.02742    | 4.100   | 0.000234 |
| Log <sub>10</sub> (size)           | -0.09229 | 0.02414    | -3.823  | 0.000520 |
| Kingdom (0=animal, 1=plant)        | 0.34567  | 0.05091    | 6.789   | 7.16e-08 |
| Log <sub>10</sub> (size) : Kingdom | -0.12337 | 0.06075    | -2.031  | 0.049935 |

2 Overall F-statistic: 18.24 on 4 and 35 DF, p-value: 3.518e-08, adjusted R-squared: 0.6388

3

4

5

6

## 1 **Figure Legends:**

2 Figure 1. Estimating the impact of selection on linked neutral variation. To obtain a direct estimate of  
3 the amount of linked neutral variation removed by selection, we fit a population genetic model  
4 incorporating hitchhiking and background selection effects to the estimates of  $\pi$  and recombination  
5 rate in 500 kb windows across the genome. Model fit (blue), estimated neutral diversity in the absence  
6 of selection (red), and observed genetic diversity (dashed) are shown for a species with large  
7 population size (*D. melanogaster*, part A) and small population size (*Equus ferus przewalskii*, part B).  
8 The magnitude of the impact of selection on linked neutral diversity is estimated as  $1 - (\text{observed}$   
9  $\text{neutral diversity} / \text{neutral diversity in the absence of selection})$ .

10

11 Figure 2. The correlation between neutral diversity and recombination rate is stronger in taxonomic  
12 classes expected to have larger population sizes. We estimated both neutral diversity and recombination  
13 rate in 500-kb windows across the genome and computed partial correlations (Kendall's  $\tau$ ) after  
14 accounting for variation in functional density (measured as proportion of sites in a window that are part  
15 of an annotated protein-coding exon). The significance of differences in median  $\tau$  (red diamonds)  
16 between vertebrates and invertebrates, or between woody and herbaceous plants, is based on Wilcoxon  
17 Rank Sum Tests (\*\*\*)  $P < 0.001$ , \*\*  $P < 0.01$ , \*  $P < 0.05$ .

18

19 Figure 3. Proxies for census size are correlated with the estimated impact of selection on neutral  
20 diversity. For each species, we obtained estimates of size (in meters) and range (in square kilometers),  
21 and used those as predictors in a linear model with a measure of the impact of selection on neutral  
22 diversity as the response (see main text and Table 2 for full model information). Both size (part A) and



1 range (part B) are significant predictors of the impact of selection on neutral diversity, in the expected  
2 directions. Points are colored by kingdom (blue=animals, green=plants), and regression lines estimated  
3 independently for plants and animals are shown. C) Robustness of our model fit. We tested our main  
4 model (see text and Table 2) across a wide range of different analysis options, including different SNP  
5 filtering options, different window sizes, and different population genetic parameters. Each point  
6 represents the adjusted  $R^2$  of the full model for one set of parameter values, colored according to P-  
7 value.

8

9 Figure 4. Species with little evidence for selection have smaller census sizes. For each species, we  
10 estimated the relative likelihood of a purely neutral model (no impact of selection on neutral diversity),  
11 based on AIC values for neutral and selection models (see methods for details), and categorized species  
12 based on support for neutrality (low = relative likelihood  $< 0.05$ , medium = relative likelihood  $> 0.05$   
13 but  $< 0.5$ , high = relative likelihood  $> 0.50$ ). Species with more support for neutrality have smaller  
14 ranges (part A) and larger body size (part B). P-values for comparisons (indicated by lines at the top of  
15 each panel) of low vs. high; low vs. medium; and low vs. medium and high combined are based on  
16 Wilcoxon Rank Sum tests (\*\* $P < 0.001$ , \*\*  $P < 0.01$ , \*  $P < 0.05$ ).

1 **Supplemental Materials**

- 2  
3 Table S1: details of species used  
4 Table S2: links to online data sources for species used  
5 Table S3: correlation robustness analysis  
6 Table S4: model fit to residuals of nuisance parameter model  
7 Table S5: model fit to residuals of nuisance parameter model (minus genome size)  
8 Table S6: model fit after removing domesticated species  
9 Table S7: model fit to animals only  
10 Table S8: model fit to plants only  
11 Table S9: list of sizes for each species along with source  
12 Table S10: accessions for polymorphism data  
13 Table S11: sites aligned for each species  
14 Table S12: summary of map curation / cleaning steps for each species  
15 Table S13: final map quality summary  
16 Table S14: estimates of selfing and associated references  
17 Table S15: quality parameters used in linear modeling

18  
19 Supplemental Figures:

- 20  
21 Figure S1: bioinformatic pipeline schematic

22  
23 Supplemental Text:

- 24  
25 Text S1: details of map construction for each species  
26 Supplemental References: references from supplemental tables

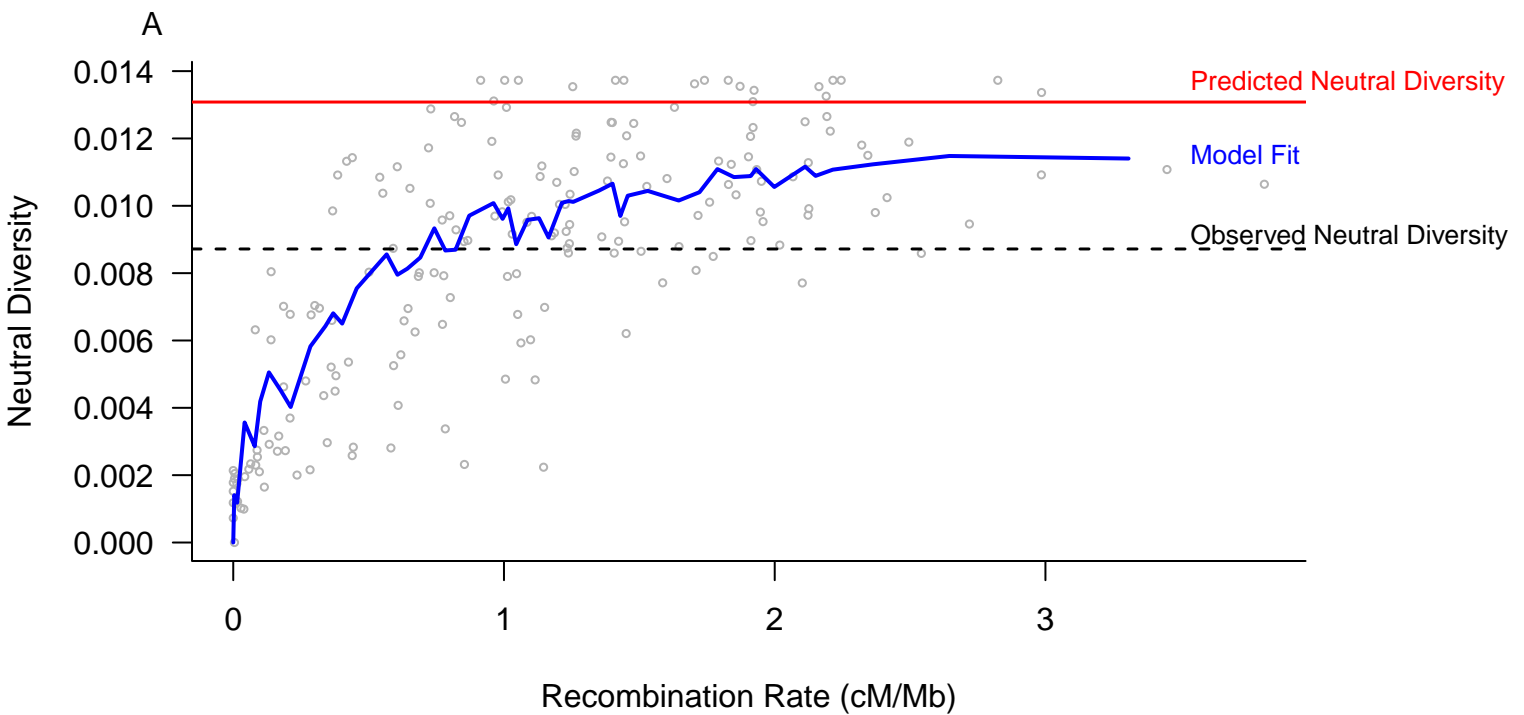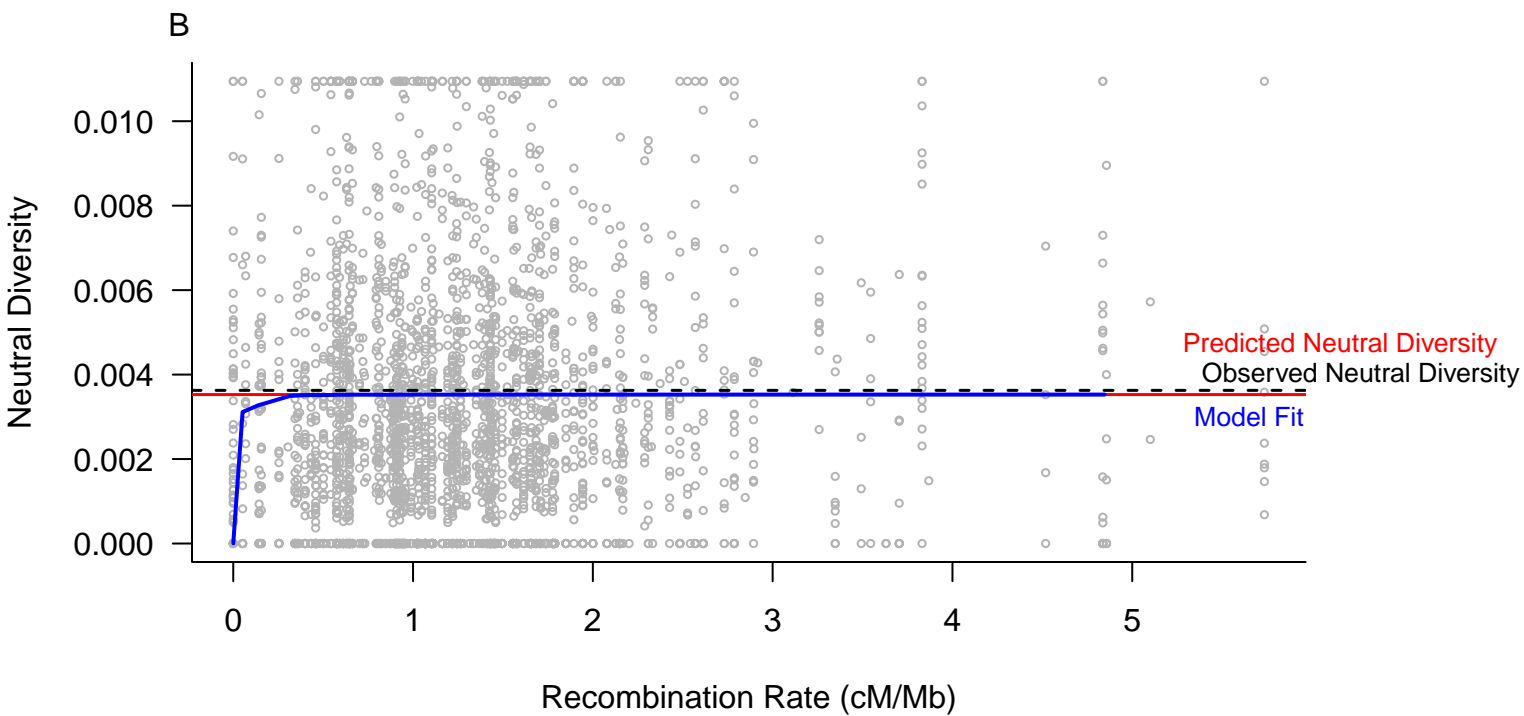

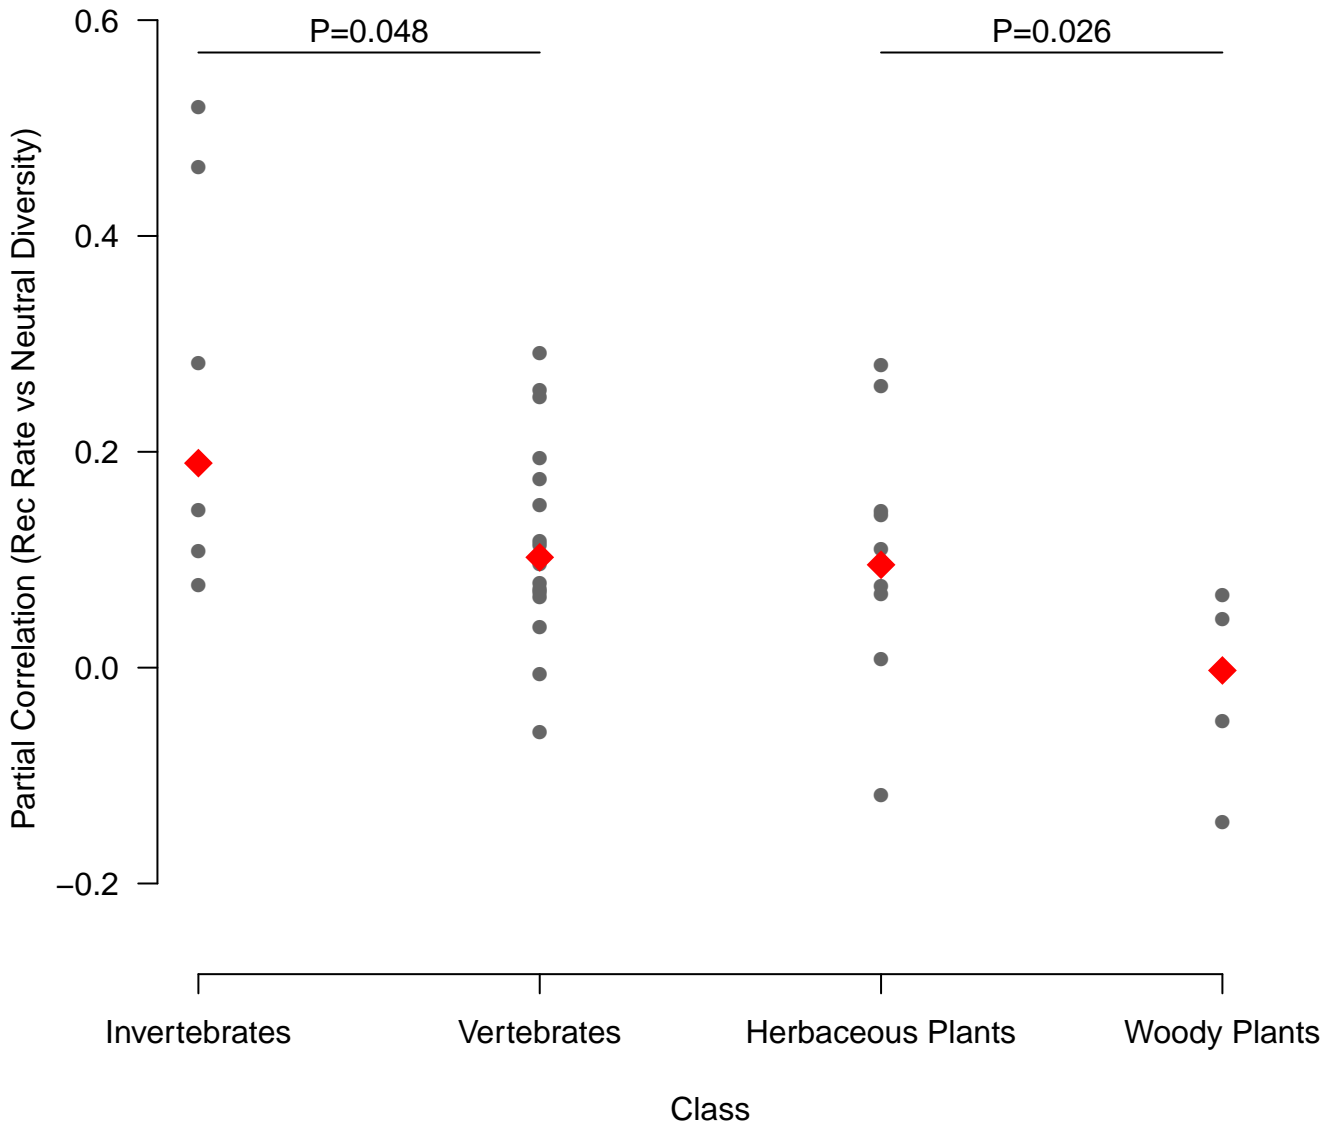

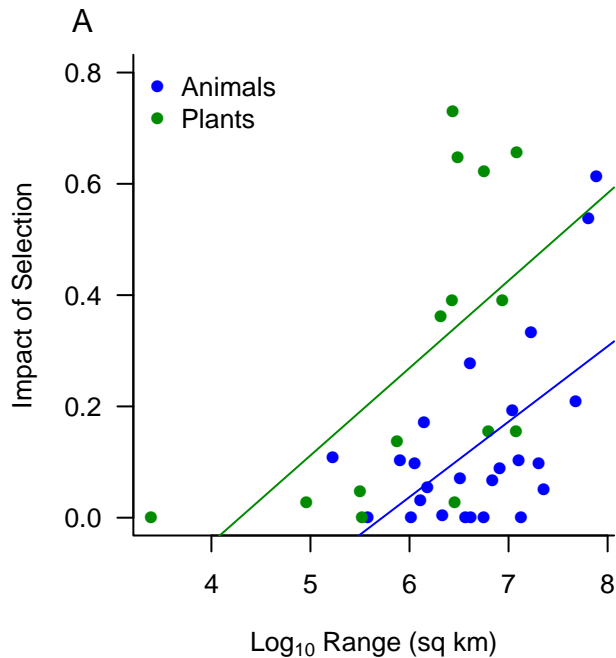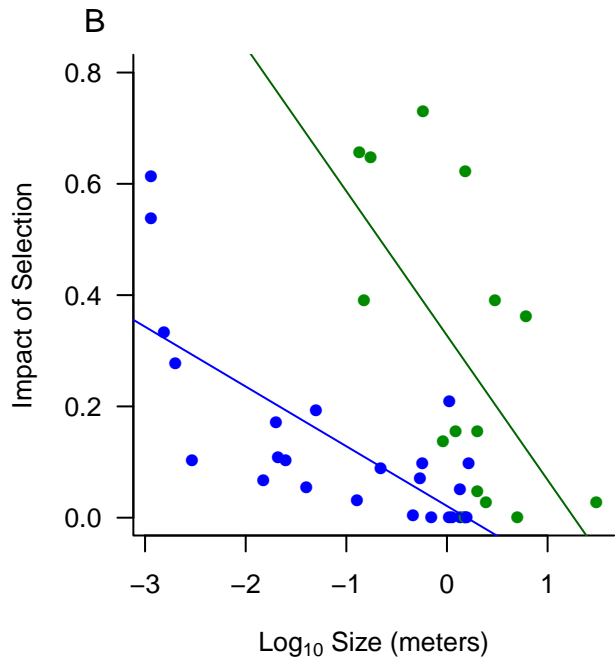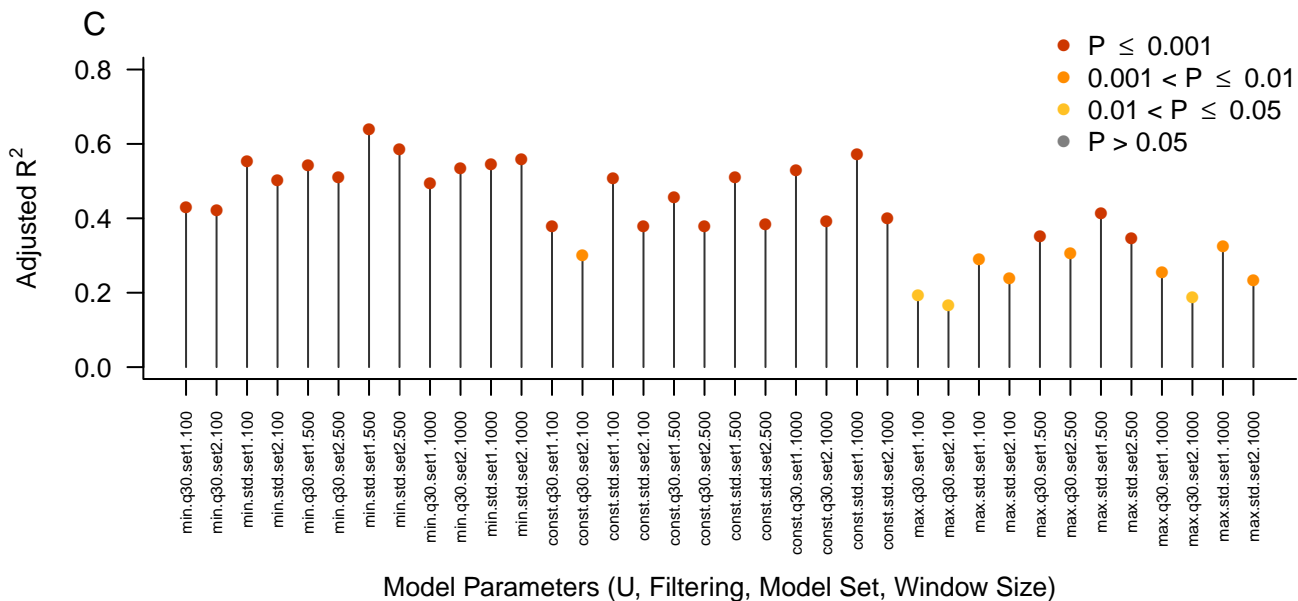

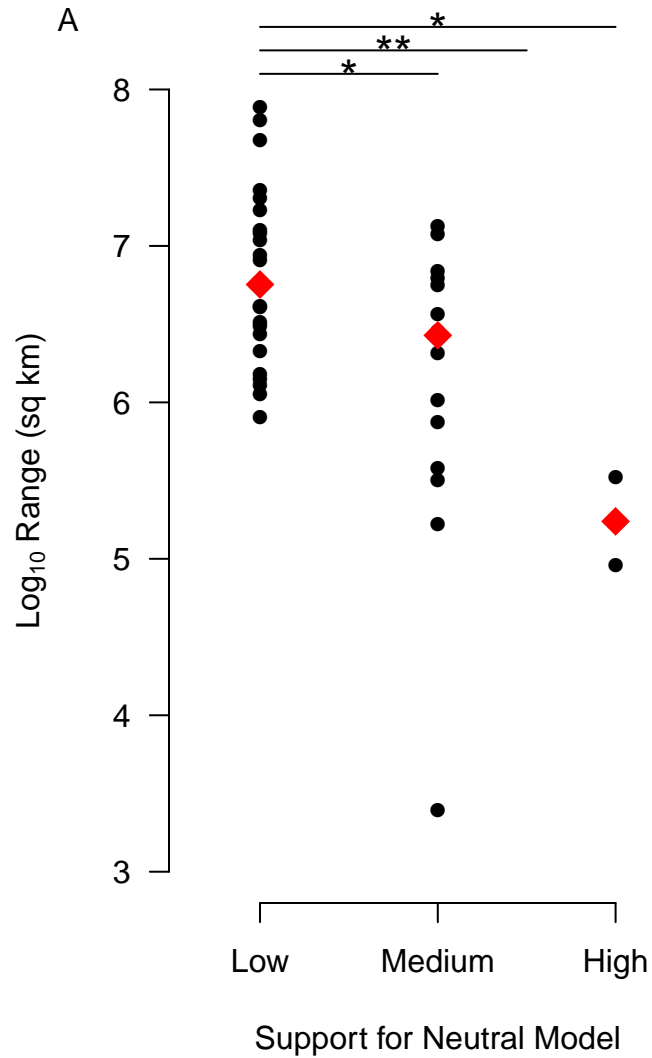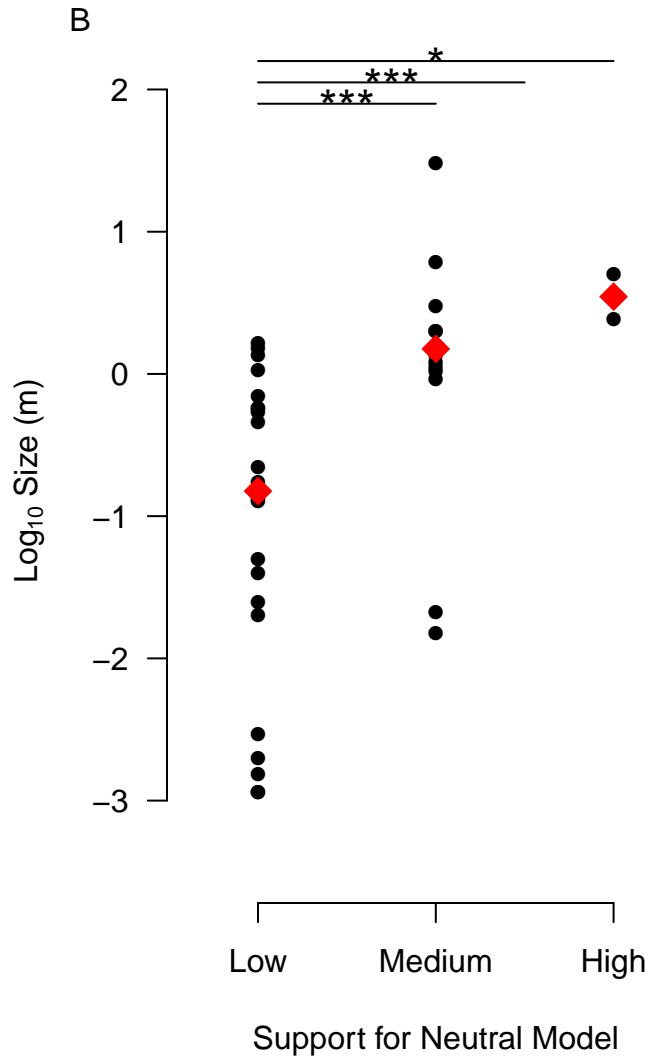

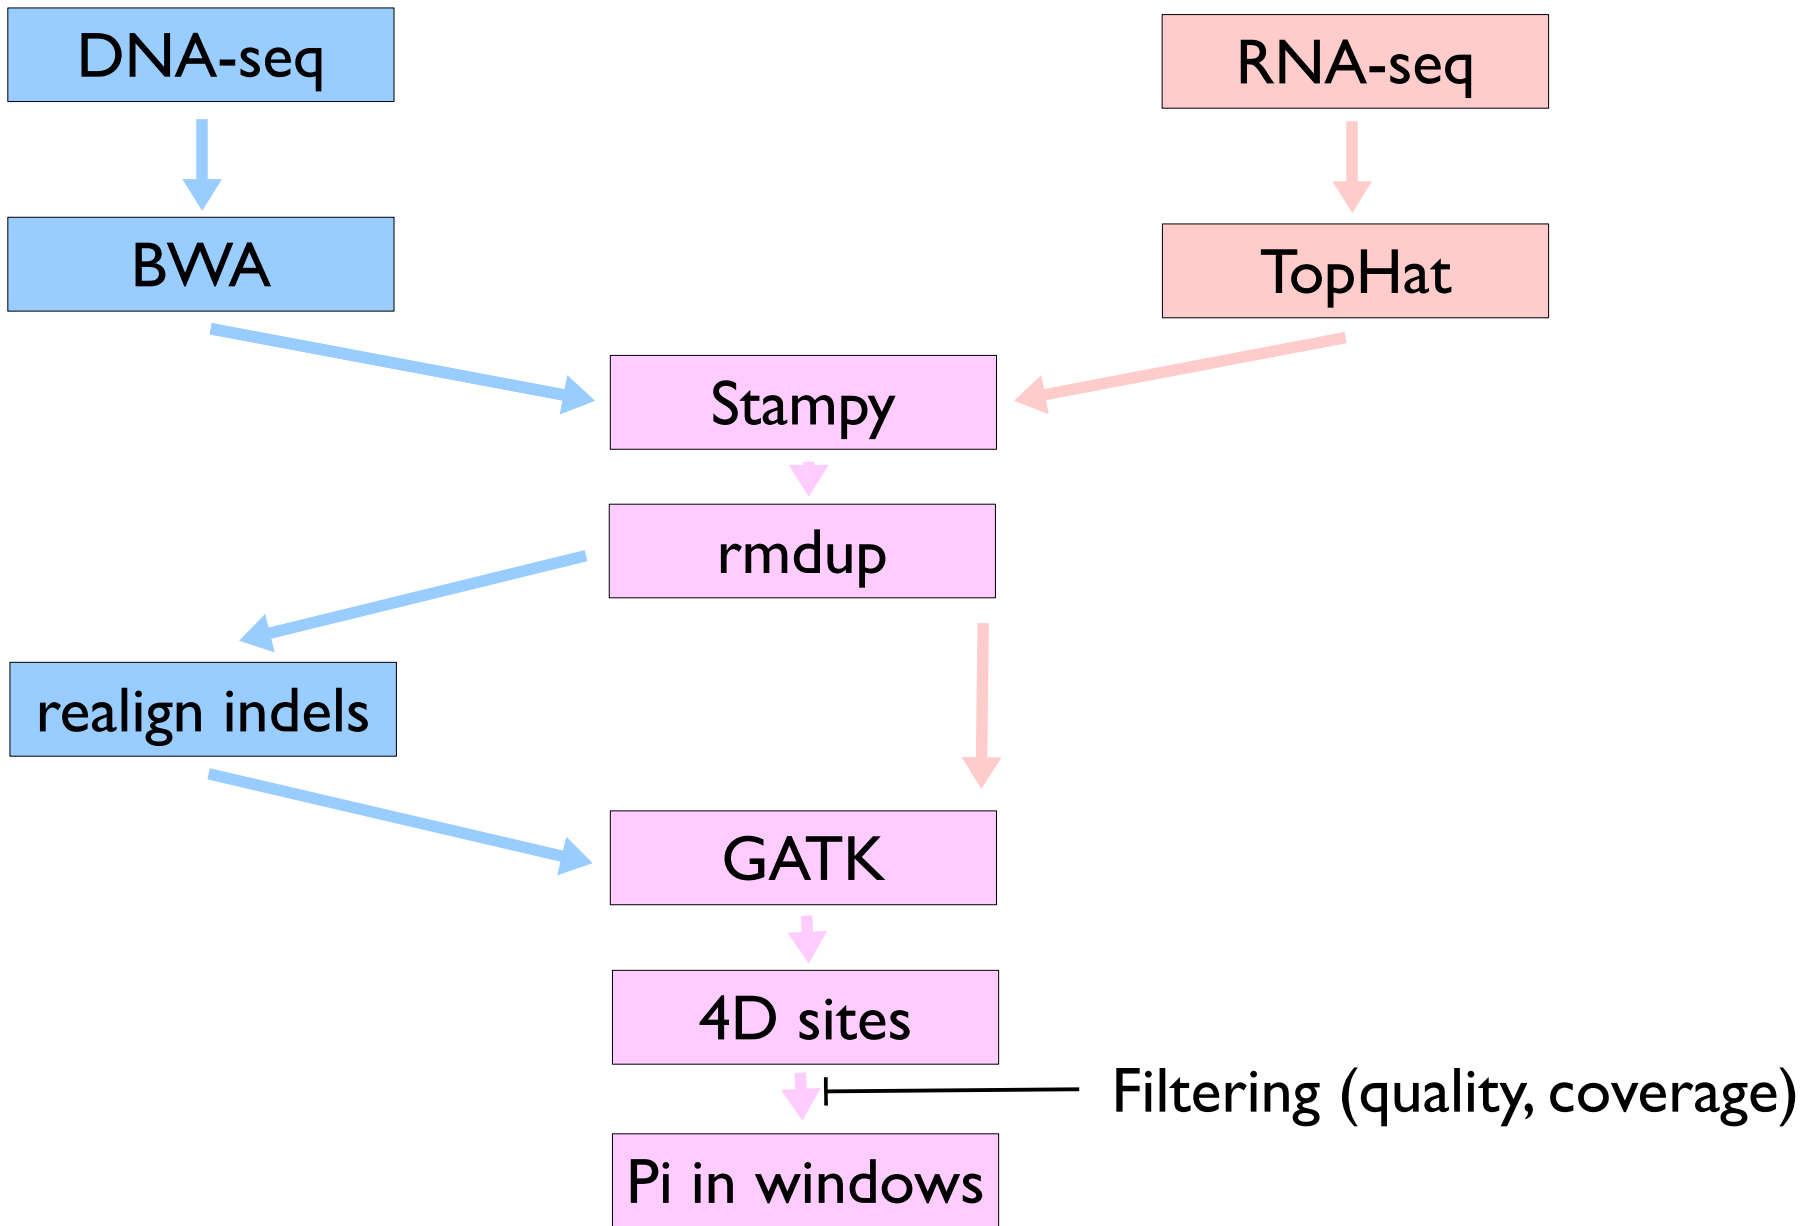

Source: http://biorxiv.org/content/10.1101/006122v2.full.pdf
